# Supplementary material for: Genomic architecture constrained placental mammal X Chromosome evolution
Source: HighWire-hosted journal article supplement (doi:10.1101/gr.275274.121), 2021-07-22
Supplement: Supplemental_Tables_.xlsx [file Supplemental_Tables_.xlsx]

## Sheet: SupplementalTableS1
Supplemental Table S1. BAC clones sequenced and assembled for this study from the Felis catus female BAC library FSCC from Amplicon Express.
Clone	Assembly Length	X Start	X End	BLAST Length	Orientation	Gap	Gap Spanned	Identity	Query Coverage
FCAB-33C13	238715	20834159	21072609	238450	reverse	No	NA	99.9+%	0.999
FCAB-252P24	169583	22100405	22272041	171636	forward	No	NA	99.9+%	0.996
FCAB-119B21	183911	22410045	22593683	183638	reverse	No	NA	99.9+%	0.998
FCAB-249D18	175324	23607503	23784075	176572	forward	No	NA	99.9+%	99.9+%
FCAB-204B24	179016	23943803	24122813	179010	reverse	No	NA	99.9+%	99.9+%
FCAB-8C17	134432	32334177	32463016	128839	reverse	No	NA	99.9+%	0.949
FCAB-185N2	127836	32442450	32546221	103771	forward	32,517,052-32,517,152	Yes	99.9+%	0.749
FCAB-142K3	111769	32486718	32602742	116024	forward	32,517,052-32,517,152	Yes	99.9+%	0.994
FCAB-8C17-185N2	241687	32334177	32546221	212044	forward	32,517,052-32,517,152	Yes	99.9+%	0.839
FCAB-150K12	184107	33158996	33348055	189059	reverse	33,298,646-33,299,144	Yes	99.9+%	0.912
FCAB-208C24	160042	Ends in gap	33863224	NA	forward	33,652,424-33,708,759	No	0.998	0.885
FCAB-121A12	257950	41948456	42209759	261303	reverse	No	NA	0.998	99.9+%
FCAB-95E10	239858	42282090	42529989	247899	forward	No	NA	0.999	0.999
FCAB-100P9	237719	42502450	42736322	233872	forward	No	NA	99.9+%	0.966
FCAB-95E10-100P9	449985	42282090	42736322	454232	forward	No	NA	99.9+%	0.982
FCAB-173P5	244847	43390319	43634864	244545	reverse	No	NA	99.9+%	0.997
FCAB-201P4	175838	44977504	45154735	177231	reverse	No	NA	99.9+%	0.998
FCAB-259J16	209572	45251849	45461127	209278	forward	No	NA	99.9+%	0.998
FCAB-204F6	211725	Ends in gap	46197369	NA	reverse	46,047,039-46,047,138	No	99.9+%	0.709
FCAB-31J21	205850	46642669	Ends in gap	NA	reverse	46,806,000-46,806,100	No	99.9+%	0.783
FCAB-174L20	131839	46793384	46837270	43886	reverse	46,806,000-46,806,099	Yes	99.9+%	0.332
FCAB-31J21-174L20	280356	46642669	46837270	194601	forward	46,806,000-46,806,100	Yes	99.9+%	0.686
FCAB-238C17	169848	47525890	47696251	170361	forward	No	NA	99.9+%	99.9+%
FCAB-120M10	163279	47588289	47752040	163751	forward	No	NA	99.9+%	0.994
FCAB-287E2	202415	47598545	47801430	202885	forward	No	NA	99.9+%	0.995
FCAB-275M22	138636	47629840	47768727	138887	reverse	No	NA	99.9+%	0.992
FCAB-39C5	188732	47786959	47978054	191095	reverse	No	NA	99.9+%	99.9+%
FCAB-238C17-120M10-287E2-275M22-39C5	449261	47525890	47978054	452164	forward	No	NA	99.9+%	0.997
FCAB-83L9	151285	48047088	48199192	152104	reverse	No	NA	99.9+%	99.9+%
FCAB-117E18	186808	Ends in gap	48630108	NA	reverse	48,422,751; 48,515,913	48,515,913 spanned	0.999	0.873
FCAB-205P3	233420	Unclear	Unclear	NA	reverse	49476788; 49510742	Unclear	0.998	0.562
FCAB-309N18	133097	Unclear	Unclear	Unclear	Unclear	Unclear	Unclear	Unclear	Unclear
FCAB-86B10	99124	49615208	49714555	99347	reverse	No	NA	99.9+%	0.983
FCAB-237G9	157486	49650370	49808094	157724	reverse	No	NA	99.9+%	0.994
FCAB-141O2	164325	49743731	49923230	179499	reverse	No	NA	99.9+%	0.997
FCAB-127P13	158243	49865345	50027913	162568	reverse	No	NA	99.9+%	0.997
FCAB-205P3-309N18-86B10-237G9-141O2-127P13	629752	49527913	50027913	500000	forward	No	NA	99.9+%	0.735
FCAB-17I12	139800	50253823	50355933	102110	forward	50,326,189-50,326,288	Yes	99.9+%	0.522
FCAB-179D2	155554	Ends in gap	52652819		forward	50,521,358-52,521,357	No	99.9+%	0.918
FCAB-137K7	189068	53342260	53576912	234652	reverse	No	NA	99.9+%	99.9+%
FCAB-271N13	260836	57134058	57395674	261616	forward	No	NA	99.9+%	0.997
FCAB-256L9	175642	61911666	62108014	196348	reverse	61956860	Yes	99.9+%	99.9+%
FCAB-100A3	137026	62466700	62605414	138714	forward	No	NA	99.9+%	99.9+%
FCAB-261A2	157020	62714864	62871983	157119	forward	No	NA	99.9+%	99.9+%
FCAB-182J5	208434	63836592	64057428	220836	forward	No	NA	99.9+%	0.998
FCAB-278C20	157811	63938560	64103141	164581	forward	No	NA	0.998	0.998
FCAB-182J5-278C20	253589	63836592	64103141	266549	forward	No	NA	0.999	0.998
FCAB-158E6	187851	64694492	64883566	189074	reverse	No	NA	99.9+%	0.998
FCAB-226I7	221997	64979879	65206789	226910	reverse	No	NA	99.9+%	0.994
FCAB-314I22	233015	65774740	66008622	233882	forward	No	NA	99.9+%	0.992
FCAB-184D11	183500	74939604	Ends in gap	NA	reverse	75,084,129-75,084,228	No	0.999	0.656
FCAB-44I3	92899	75035654	Ends in gap	NA	reverse	75,084,129-75,084,228	No	0.996	0.263
FCAB-184D11-44I3	188891	74939604	Ends in gap	NA	forward	75,084,129-75,084,228	No	0.999	0.637
FCAB-205N19	218342	77597851	77816551	218700	reverse	No	NA	99.9+%	0.999
FCAB-154F16	230586	80448478	80678552	230074	reverse	No	NA	0.997	99.9+%
FCAB-326J11	154759	Ends in gap	84961267	NA	reverse	84,837,303-84,837,801	No	0.996	0.493
FCAB-192L23	119007	85807622	Ends in gap	NA	reverse	85921508	No	99.9+%	0.957
FCAB-265O20	133961	86051873	86187045	135172	reverse	No	NA	99.9+%	0.998
FCAB-151N4	236889	86070152	86308140	237988	forward	No	NA	99.9+%	0.999
FCAB-265020-151N4	253749	86051873	86308140	256267	forward	No	NA	99.9+%	0.999
FCAB-212B23	122276	88591659	88714980	123321	reverse	No	NA	99.9+%	0.957
FCAB-52K13	112352	88817443	88929875	112432	reverse	No	NA	99.9+%	0.993
FCAB-92N14	106781	88823027	88929883	106856	reverse	No	NA	99.9+%	0.992
FCAB-137M13	105310	88824490	88929875	105385	reverse	No	NA	99.9+%	0.992
FCAB-185B10	139897	88824513	88964508	139995	reverse	No	NA	99.9+%	0.994
FCAB-52K13-92N14-137M13-185B10	146961	88817443	88964508	147065	forward	No	NA	99.9+%	0.994
FCAB-319N21	157163	95638746	95799266	160520	forward	No	NA	0.999	0.998
FCAB-208B12	192591	96459107	96651711	192604	reverse	No	NA	99.9+%	99.9+%
FCAB-206I16	184413	97552011	97736027	184016	forward	No	NA	99.9+%	0.991
FCAB-88D1	207808	100686264	100893798	207534	forward	No	NA	99.9+%	0.996
FCAB-165E15	244297	100835916	101085257	249341	forward	No	NA	99.9+%	99.9+%
FCAB-88D1-165E15	364221	100686264	101085257	398993	forward	No	NA	99.9+%	0.998
FCAB-208P17	109731	103282229	103392918	110689	forward	No	NA	99.9+%	99.9+%
FCAB-77K22	195219	103386042	103583587	197545	reverse	No	NA	99.9+%	99.9+%
FCAB-208P17-77K22	298065	103282229	103583587	301358	forward	No	NA	99.9+%	99.9+%
FCAB-89F20	157935	113531770	Ends in gap	NA	forward	113,681,637-113,789,782	No	99.9+%	0.949
FCAB-2D2	135365	Ends in gap	113905251	NA	forward	113,681,637-113,789,782	No	99.9+%	0.851
FCAB-296I24	269552	122804294	123076639	272345	reverse	No	NA	99.9+%	0.999
FCAB-68L12	192460	123030652	Ends in gap	NA	reverse	123218969	No	99.9+%	0.973
FCAB-77K16	203921	123142491	123346723	204232	reverse	123218969	Yes	99.9+%	0.891
FCAB-157F17	138162	123208238	123346723	138485	reverse	123218969	Yes	99.9+%	0.84
FCAB-296I24-68L12-77K16-157F17	539319	122804294	123346723	542429	forward	123218969	Yes	99.9+%	0.956
FCAB-70K1	224711	123372052	123596619	224567	forward	No	NA	99.9+%	0.998
FCAB-146O7	171640	125176746	125454965	278219	reverse	125178926	No	0.998	0.933
FCAB-286M16	155991	127154492	127310399	155907	reverse	No	NA	99.9+%	0.999
FCAB-60D9	200388	127912736	Ends in gap	NA	forward	128,222,943; 128,343,109	Unclear	99.9+%	0.655
FCAB-197A7	252015	127912736	Ends in gap	NA	forward	128,222,943; 128,343,110	Unclear	0.998	0.519
FCAB-201F19	269191	128240391	Ends in gap	NA	reverse	128,222,943; 128,343,110	Unclear	0.998	0.379
FCAB-174G3	136721	Ends in gap	Ends in gap	NA	forward	128,222,943; 128,343,110	Unclear	0.998	0.87
FCAB-278F23	121693	128240354	Ends in gap	NA	forward	128343110	Unclear	0.998	0.839
FCAB-60D9-197A7-201F19-174G3-278F23	287046	127912736	128178239	265503	forward	128,222,943; 128,343,110	Perhaps	0.999	0.467
FCAB-259D11	162325	129272280	Ends in gap	NA	forward	129,435,018-129,435,117	Unclear	99.9+%	0.935
FCAB-331E2	215372	Ends in gap	129505645	NA	reverse	129,435,018-129,435,117	Unclear	99.9+%	0.169
FCAB-97M22	219043	130047672	130266800	219128	forward	No	NA	99.9+%	99.9+%
FCAB-253K23	156266	130278199	130434507	156308	reverse	No	NA	1	99.9+%
FCAB-111F22	176814	130302694	130479169	176475	forward	No	NA	99.9+%	0.997
FCAB-253K23-111F22	201251	130278199	130479169	200970	forward	No	NA	99.9+%	0.998

## Sheet: SupplementalTableS2
Supplemental Table S2. Read mapping statistics from FelCat9.0 and our improved (9.1) assembly with incorporated sequenced BAC assemblies.
Clones	9.0 Error Rate	9.0 Avg Qual	9.0 Avg Insert Size	9.0 Insert Size S.D.	9.0 Reads Mapped	9.1 Error Rate	9.1 Avg Qual	9.1 Avg Insert Size	9.1 Insert Size S.D.	9.1 Reads Mapped
FCAB-33C13	0.00181935	35	333.5	107.6	92188	0.00165683	35	333.5	107.7	92315
FCAB-252P24	0.00192952	35.1	335.3	110.5	67389	0.00175404	35.2	335.1	110.1	71132
FCAB-119B21	0.00168562	35.2	335.5	111.1	75280	0.00166853	35.2	335.6	111.1	75331
FCAB-249D18	0.00186177	35.2	335.5	111	71835	0.00161824	35.2	335.2	110.6	72158
FCAB-204B24	0.00172419	35.2	337.9	112.1	74542	0.00163433	35.2	337.9	112.1	74490
FCAB-8C17-185N2	0.0035115	35.1	356	189.3	135297	0.00230237	35.1	335.1	108.2	133834
FCAB-150K12	0.00243658	35.1	335.5	112.8	88278	0.001977	35.1	335	108.9	84636
FCAB-208C24	0.00186722	35.1	335.9	110.3	58345	0.00185665	35.1	334.7	108.9	74847
FCAB-121A12	0.00281027	34.9	331	105.4	96795	0.00263706	34.9	330.8	105.1	97036
FCAB-95E10-100P9	0.00298645	35	333	107.4	171086	0.00262532	35	333.1	107.1	171428
FCAB-173P5	0.00326999	35.1	334.5	109.5	98491	0.0030649	35.1	333.9	108.7	100186
FCAB-201P4	0.00207602	35.1	336.1	111.1	73123	0.00192083	35.1	335.8	110.2	74538
FCAB-259J16	0.00195117	35.2	336.2	111.4	86583	0.00222411	35.2	335.4	110.7	89774
FCAB-204F6	0.00209164	35	333.9	107.3	56422	0.00293264	35	333.4	107.3	96211
FCAB-31J21-174L20	0.00243279	35.1	335.2	109.4	82093	0.00202113	35.1	335.2	109.1	121111
FCAB-238C17-120M10-287E2-275M22-39C5	0.00225739	35.1	335.5	109.8	184433	0.00198543	35.1	335.4	109.3	187548
FCAB-83L9	0.00189069	35.1	336.8	111.2	61900	0.00217491	35.1	336.3	110.8	62276
FCAB-117E18	0.00195636	35.2	337.6	111.8	68984	0.00188668	35.2	337.2	111.5	86073
FCAB-205P3-309N18-86B10-237G9-141O2-127P13	0.00206315	35.1	336.4	111.1	196496	0.00190378	35.1	335.6	109.9	243553
FCAB-17I12	0.00196021	35.1	335.5	109.8	39398	0.00191283	35.1	335.4	110.4	57913
FCAB-179D2	0.00194057	35.1	336.7	111.2	46226	0.00194545	35.1	336.6	111.9	58180
FCAB-137K7	0.0019869	35.2	336.5	111.6	96150	0.00179983	35.2	336.1	110.7	78255
FCAB-271N13	0.0021662	35.2	336.1	111.3	106478	0.0018436	35.2	335.6	110.6	109355
FCAB-256L9	0.00226119	35.1	335.2	109.7	71273	0.00212195	35.1	335.6	109.5	73632
FCAB-100A3	0.00239616	35.1	334.8	110.4	56546	0.00221349	35.1	334.3	109.8	56570
FCAB-261A2	0.00233283	35.1	336.1	110.4	65990	0.00221207	35.1	336.2	110.4	66236
FCAB-182J5-278C20	0.00239688	35.1	335.6	111.3	106387	0.00222032	35.1	334.9	110	108634
FCAB-158E6	0.00220718	35.2	337.1	111.5	77586	0.00198203	35.2	336.9	111.1	79251
FCAB-226I7	0.00229895	35.1	336.9	110.5	94418	0.0021624	35.1	336.4	110	93645
FCAB-314I22	0.00236654	35.2	336.1	111.3	94022	0.00216467	35.2	335.8	110.7	97302
FCAB-184D11-44I3	0.00227031	35.1	336.2	110.6	52438	0.00216392	35.2	335.6	110.3	94196
FCAB-205N19	0.0029299	35.2	335.7	110.4	89540	0.00270336	35.2	335.5	110	90237
FCAB-154F16	0.00190375	35.2	336.2	111.2	94831	0.00182402	35.2	336.3	111.2	95319
FCAB-326J11	0.0024948	35.1	334.5	108.7	63259	0.00242679	35.1	335.1	109	84513
FCAB-192L23	0.00224857	35.1	335.5	109.6	89636	0.00194739	35.1	337	111.2	52031
FCAB-265020-151N4	0.00234405	35.1	336.6	111.2	102681	0.00221097	35.1	336.2	110.5	51886
FCAB-212B23	0.00194308	35.2	337	111.2	48784	0.00316087	35.2	336.8	111.6	58184
FCAB-52K13-92N14-137M13-185B10	0.0018091	35.2	335.9	110.1	55988	0.00174458	35.2	336.1	109.9	63138
FCAB-319N21	0.00375855	35	333.6	108.4	61192	0.00350261	35	333.1	107.8	61310
FCAB-208B12	0.00187494	35	333.4	108.5	75935	0.00189372	35	333.1	108.1	77536
FCAB-206I16	0.00196315	35	332.2	107.2	69535	0.00188908	35	332.2	106.9	70315
FCAB-88D1-165E15	0.00205779	34.9	331.9	106.3	147697	0.00191011	34.9	331.9	106.4	148301
FCAB-208P17-77K22	0.00182632	35	334.6	108.7	119245	0.001715	35	334.5	108.7	119275
FCAB-89F20	0.00261972	34.9	331.7	106.9	57927	0.00235146	34.9	331.4	106.2	61175
FCAB-2D2	0.002374	34.9	331.1	105.9	40557	0.00240956	34.9	331.7	105.9	59139
FCAB-296I24-68L12-77K16-157F17	0.00181429	35.2	336.7	111.6	212705	0.00162926	35.2	336.6	111.3	221409
FCAB-70K1	0.00183782	35.1	335.8	109.9	89608	0.00174015	35.1	335.9	110	89755
FCAB-146O7	0.00328803	35.1	594.2	1374	66625	0.00364813	34.9	332.6	107.8	110293
FCAB-286M16	0.00194904	35.1	336.7	110.7	65185	0.00186337	35.1	336.4	110.2	65892
FCAB-60D9-197A7-201F19-174G3-278F23	0.00208459	35	333.3	107.3	93109	0.00247466	34.9	332	105.7	92169
FCAB-259D11	0.00318227	34.6	336.9	149.9	55960	0.00205444	34.7	328.1	101.5	53786
FCAB-331E2	0.00230123	34.9	332.3	108.1	26406	0.00239974	34.7	329.2	104.2	85834
FCAB-97M22	0.00207544	35.2	337.1	111.1	92442	0.00190692	35.2	337.1	110.9	93595
FCAB-253K23-111F22	0.00185249	35.2	335.5	110.1	78296	0.00178849	35.2	335	109.2	79367

## Sheet: SupplementalTableS3
Supplemental Table S3. Genomic coordinates, RNA expression levels (fragments per kilobase per million mapped reads), and BLASTP results for eight novel transcripts identified in this study.
Locus	9.1 Start	9.1 End	Testes 1 FPKM	Testes 2 FPKM	Cerebellum FPKM	Heart FPKM	Kidney FPKM	Lung FPKM	BLASTP hit	E value
FCAB-31J21-174L20_Transcript1	46147611	46149337	NA	17.44	NA	3.356	7.584	42.943	No significant hit	NA
FCAB-205P3-309N18...127P13_Transcript1	49065362	49066904	3459.02	NA	417.686	103.6	269.31	361.13	No significant hit	NA
FCAB-89F20_Transcript1	113260518	113371029	391.33	164.759	2.573	21.8	15.026	9.74566	No significant hit	NA
FCAB-331E2_Transcript1	128973412	128976005	1712.91	174.335	373.087	124.44	359.18	431.8	No significant hit	NA
FCAB-331E2_Transcript2	128981795	128986452	NA	NA	NA	2.551	NA	18.165	Select seq XP_026911154.1 LOW QUALITY PROTEIN: olfactory receptor 3A3-like [Acinonyx jubatus]	4e-111
FCAB-331E2_Transcript3	129004897	129011236	NA	135.718	18.84	3.87	8.225	27.36	DUF1725 domain-containing protein [Neisseria polysaccharea]	4e-53
FCAB-331E2_Transcript4	129011378	129012810	135.9	16.17	12.997	3.87038	8.225	27.369	Select seq XP_025785020.1 cancer/testis antigen 1-like [Puma concolor]	3e-46
FCAB-331E2_Transcript5	129021032	129022179	982.265	NA	4.181	NA	5.1193	14.25	No significant hit	NA

## Sheet: SupplementalTableS4
Supplemental Table S4. Manual alignment of human, domestic cat, pig, and mouse X chromosomes based on conserved gene content. Genes within ampliconic regions are italicized, underlined, and in bold. Ampliconic regions without genes are indicated in black with white text. Novel cat genes identified in this study are italicized and named according to the clone in which they were identified.
Start	Human Start	Human End	Cat Start	Cat End	Pig Start	Pig End	Mouse Start	Mouse End	Notes on gene loss and gain events in mouse lineage inferred from Ensembl gene trees
PLCXD1	276324	303356	57166	82324	Unplaced	Unplaced	-	-
GTPBP6	304750	318819	119686	131954	Unplaced	Unplaced	-	-
LOC102901245	-	-	134637	198935	-	-	-	-				HUMAN BLOCK ORDER
LOC111558781	-	-	199003	207366	-	-	-	-				ASMT	170672644	170678054
PPP2R3B	333933	386955	207276	267874	Unplaced	Unplaced	-	-				PRKX	77760972	77796222
SHOX	624344	659411	530158	539931	Unplaced	Unplaced	-	-	Lost in Myomorpha			OBP	77837898	77853500
CRLF2	1190437	1212762	912887	936497	Unplaced	Unplaced	-	-				TBL1X	77510547	77662713
CSF2RA	1268800	1325097	975880	994473	Unplaced	Unplaced	-	-				GPR143	152781921	152808651
LOC102901718	-	-	1000391	1023639	-	-	-	-				CLDN34	152537528	152564198
IL3RA	1336575	1382689	1030029	1055668	Unplaced	Unplaced	-	-				MID1	169685199	169990798
SLC25A6	1386152	1392146	1055595	1059018	Unplaced	Unplaced	-	-	Lost in Sciuromorpha and Myomorpha			SAT1	155213126	155216449
LOC105373102	1392349	1396881	-	-	-	-	-	-				APOO	94367011	94417093
ASMTL	1403139	1453794	1064129	1086806	Unplaced	Unplaced	-	-	Lost in Myomorpha			PRRG1	78449610	78583912
P2RY8	1462572	1537488	1094182	1138047	Unplaced	Unplaced	-	-	Lost in Caviomorpha and Myomorpha			LANCL3	9199973	9268085
LOC109496913	-	-	1135898	1139304	-	-	-	-				SPACA5	21068488	21077959
LOC111558770	-	-	1156778	1159735	-	-	-	-				SSX5	8803691	8811422
AKAP17A	1591593	1602520	1156797	1171088	Unplaced	Unplaced	-	-	Lost in Muroidea			NUDT11	6047507	6054751
ASMT	1595455	1643081	1182975	1225823	Unplaced	Unplaced	170672644	170678054				GSPT2	94636069	94638562
DHRSX	2219506	2500974	1279685	1542722	-	-	-	-	Lost in Myomorpha			MAGED1	94535474	94542074
ZBED1	2486414	2500967	1532444	1546462	Unplaced	Unplaced	-	-	Lost in Rodentia			GPR173	152343598	152368966
CD99	2691133	2741309	1633819	1665788	-	-	-	-				ALAS2	150547417	150570622
XG	2751108	2816500	1666419	1704985	11104	31716	-	-	Lost in Rodentia			MAGEH1	153036166	153037563
GYG2	2828712	2882820	1719668	1751867	52310	89412	-	-	Lost in Myomorpha			SPIN2B	153832001	153834243
ARSD	2903970	2929375	1755393	1782760	107992	125985	-	-	Lost in Caviomorpha and Myomorpha			ZDXB	94724569	94730191
ARSE	2934632	2968310	1782867	1800955	131769	156083	-	-				LUZP4	148857694	148924139
ARSH	3006613	3033385	1809229	1831713	-	-	-	-	Lost in Sciuromorpha and Myomorpha			PLS3	75785654	75875178
ARSF	3040234	3112729	1841434	1872523	184977	220103	-	-	Lost in Glires			DXZ4	75600000	75600000
LOC110257789	-	-	-	-	418073	433468	-	-				AGTR2	21484549	21488833
MXRA5	3308565	3347098	1985406	2015594	486396	517329	-	-	Lost in Sciuromorpha and Myomorpha			RAB39B	75572045	75578231
Cldn34b3	-	-	-	-	-	-	76264306	76267673							?
Cldn34b4	-	-	-	-	-	-	76385323	76397979
Cldn34d	-	-	-	-	-	-	76582610	76602924
PRKX	3604343	3713634	2162556	2238207	657421	753739	77760972	77796222				MOUSE BLOCK ORDER
OBP	-	-	2972471	3088371	2012066	2019074	77837898	77853500				NUDT11	6047507	6054751
Gm14744 (OBP duplicate)	-	-	-	-	-	-	77864758	77870033				SSX5	8803691	8811422
5430402E10Rik (Obp1-like)	-	-	-	-	-	-	77919786	77925062				LANCL3	9199973	9268085
Obp1a	-	-	-	-	-	-	78085505	78091374				SPACA5	21068488	21077959
Gm5938	-	-	-	-	-	-	78125467	78130403				AGTR2	21484549	21488833
Obp1b	-	-	-	-	-	-	78186808	78192242				RAB39B	75572045	75578231
Gm14743	-	-	-	-	-	-	78240462	78245921				DXZ4	75600000	75600000
4930480E11Rik	-	-	-	-	-	-	78369643	78371128				PLS3	75785654	75875178
LOC110257836	-	-	-	-	2127385	2145225	-	-				TBL1X	77510547	77662713
Human Ampliconic	3821643	3938401	-	-	-	-	-	-				PRKX	77760972	77796222
NLGN4X	5890026	6228882	3662083	3986209	2701397	3103824	-	-	Lost in Myomorpha			OBP	77837898	77853500
VCX3A	6533618	6535118	-	-	-	-	-	-				PRRG1	78449610	78583912
PUDP	6768840	7148190	4213632	4703425	3577487	3876142	-	-				APOO	94367011	94417093
STS	7147252	7354643	4702017	4862259	3926027	4076900	-	-				MAGED1	94535474	94542074
VCX	7842262	7844143	-	-	-	-	-	-				GSPT2	94636069	94638562
PNPLA4	7898763	7928587	5344916	5379562	4540846	4623831	-	-				ZDXB	94724569	94730191
VCX2	8169944	8171267	-	-	-	-	-	-				LUZP4	148857694	148924139
VCX3B	8464830	8466510	-	-	-	-	-	-				ALAS2	150547417	150570622
ANOS1	8528874	8732187	5921251	6106892	5163638	5363835	-	-	Lost in Myomorpha			GPR173	152343598	152368966
FAM9A	8790795	8801383	-	-	-	-	-	-				CLDN34	152537528	152564198
FAM9B	9024232	9197176	-	-	-	-	-	-				GPR143	152781921	152808651
TBL1X	9463295	9719740	6801831	7040922	5994324	6238843	77510547	77662713				MAGEH1	153036166	153037563
GPR143	9725413	9765965	7027703	7095421	6242296	6276654	152781921	152808651				SPIN2B	153832001	153834243
LOC110257838	-	-	-	-	6295275	6296381	-	-				SAT1	155213126	155216449
LOC109496425	-	-	7099539	7124318	-	-	-	-				MID1	169685199	169990798
SHROOM2	9786406	9949443	7124630	7284224	6296212	6450401	152609509	152770256				ASMT	170672644	170678054
CLDN34	9961042	9968381	7293475	7296076	6454319	6460306	152537528	152564198
LOC101087815	-	-	7315456	7316115	-	-	-	-
WWC3	10015755	10144478	7355992	7475054	6815648	6930939	-	-
CLCN4	10156945	10237660	7496466	7559678	6939637	7019745	-	-
Mouse Ampliconic	-	-	-	-	-	-	170737096	170881298
MID1	10445310	11111264	7719203	8316004	7235386	7906049	169685199	169990798
HCCS	11111286	11123086	8316195	8326732	7882609	7894489	169311530	169320371
ARHGAP6	11137543	11665701	8336730	8785167	7910851	8441579	168795094	169304440
AMELX	11293413	11300761	8439198	8453188	8055246	8063457	169175044	169187284
MSL3	11758159	11775753	8883583	8898214	8519366	8535249	168651267	168674335
FRMPD4	12137329	12724523	8941173	9799966	8625039	9451433	167471301	168577241
LOC110257839	-	-	-	-	9501052	9505154	-	-
PRPS2	12791355	12824227	9844030	9880152	9505034	9531044	167346320	167383106
TLR7	12867083	12890361	9893072	9918155	9573178	9576987	167304926	167330574
TLR8	12906620	12923169	9935203	9951074	9551284	9616762	167241123	167264329
TMSB4X	12975107	12977227	9997226	9999368	9649516	9651662	167207093	167213479
FAM9C	13035617	13044798	-	-	-	-	-	-
LOC105373133	13044544	13086975	-	-	-	-	-	-
ATXN3L	13318647	13320399	-	-	-	-	-	-
EGFL6	13569575	13633575	10554046	10610332	10218108	10284152	166523007	166585716
TCEANC	13653106	13665409	10625144	10627975	10293676	10305033	166499810	166518602
RAB9A	13689121	13709825	10646730	10669512	10328085	10349399	166457251	166479867
TRAPPC2	13712242	13734635	10673373	10684725	10353417	10366095	166440736	166453140
OFD1	13734713	13769361	10684924	10726453	10361403	10415502	166390033	166440704
GPM6B	13770922	13938824	10748223	10897814	10429496	10582768	166238943	166389033
GEMIN8	14002494	14030087	10952987	10972664	10647019	10671204	166170454	166190512
GLRA2	14448779	14731812	11391306	11563707	11111655	11288496	165129017	165327867
FANCB	14690863	14873255	11668259	11693030	11386360	11408958	164980524	164997272
MOSPD2	14873405	14922166	11693313	11746866	11409157	11473969	164936169	164980375
ASB9	15243987	15270476	12064094	12091544	11800546	11828251	164497903	164539752
ASB11	15281697	15315624	12100327	12125241	11842855	11871040	164436951	164459170
PIGA	15319451	15335554	12127895	12140825	11871746	11886519	164419685	164433916
FIGF	15345591	15384413	12146973	12182085	11893254	11933923	164373000	164402650
PIR	15384799	15493588	12182205	12271870	11934157	12034629	164269431	164373013
ACE2	15494525	15602069	12330854	12374725	12099849	12152204	164139342	164188418
CXH4orf3	-	-	-	-	12139795	12141315	-	-
BMX	15500777	15556529	12275104	12328694	12044110	12096042	164192842	164258193
TMEM27	15627316	15675624	12398418	12433031	12183793	12215474	164090187	164118859
LOC101085781 (CA5BL)	-	-	12440795	12466881	12224022	12247054	-	-
Siah1b	-	-	-	-	-	-	164070703	164076493
CA5B	15738281	15787625	12514663	12563856	12295393	12332283	163976822	164028010
ZRSR2	15789723	15825718	12569212	12597132	12336635	12365071	163935443	163958702
AP1S2	15825806	15855014	12599333	12627781	12367785	12397672	163908706	163933666
Rnf138rt1	-	-	-	-	-	-	163760139	163761332	Muridae+ Cricetidae
GRPR	16123301	16153518	12883373	12917047	12654059	12711417	163513904	163549736
MAGEB17	16167481	16172394	12928954	12932714	-	-	-	-	Lost in Rodentia
LOC101086788	-	-	13225739	13226878	-	-	-	-
LOC105261399	-	-	13277526	13280230	-	-	-	-
CTPS2	16587999	16712979	13293667	13398573	13050740	13181131	162901243	163034541
S100G	16649787	16654674	13338586	13344817	13107611	13114213	162961992	162964599
SYAP1	16719584	16762684	13398734	13429730	13181948	13206948	162856843	162888462
TXLNG	16786432	16844519	13453376	13507683	13229680	13292371	162778917	162829454
RBBP7	16844650	16870411	13508890	13533063	13293278	13317074	162760372	162779090
REPS2	16946691	17194274	13611280	13833465	13413362	13658907	162411952	162643705
NHS	17375420	17735994	14004032	14347483	13854950	14209085	161833290	162159441
SCML1	17737449	17754988	14349325	14366188	14210164	14222053	161815065	161821376
RAI2	17800049	17861346	14393607	14453640	14246776	14633071	161717036	161779494
BEND2	18162931	18220904	14771960	14815893	14635795	14703934	161357881	161364590
LOC108168453 (Bend2-like)	-	-	-	-	-	-	161297856	161334722
SCML2	18239313	18355089	14859002	14960727	14715357	14823016	161082629	161258218
CDKL5	18425605	18653629	15029852	15243399	14858826	15096969	160784308	160994681
LOC102899587	-	-	15116750	15122803	-	-	-	-
RS1	18639688	18672103	15229578	15255709	15080972	15099426	160768013	160799663
PPEF1	18675909	18827921	15271558	15381135	15111230	15251415	160622419	160751290
PHKA2	18892298	18984362	15415934	15486429	15279398	15365731	160502155	160598879
ADGRG2	18989307	19122956	15492264	15614222	15370327	15518746	160390649	160498076
LOC101089581	-	-	15755581	15774652	-	-	-	-
PDHA1	19343893	19361707	15796823	15813203	15699924	15718908	160122219	160138430
MAP3K15	19360058	19515459	15811748	15936106	15716898	15867377	159988433	160123351
SH3KBP1	19533965	19887626	15952149	16288071	15887131	16229212	159627028	159975920
BCLAF3	19912860	19991040	16315457	16372528	16252407	16312426	159532640	159593081
MAP7D2	20006713	20116996	16385043	16491221	16327718	16423546	159414524	159498958
EIF1AX	20124518	20141848	16498450	16521170	16429625	16449581	159372195	159385699
RPS6KA3	20149911	20267514	16527215	16648281	16452401	16576854	159255696	159368244
CNKSR2	21374335	21654695	17816263	18115397	17561114	17838034	157821573	158043353
KLHL34	21655349	21658387	18115305	18120112	17838070	17841718	157818435	157821060
SMPX	21705972	21758160	18213267	18231904	17889030	17938206	157698973	157752591
MBTPS2	21839538	21885423	18321450	18362813	18013360	18054250	157547822	157598715
YY2	21855987	21858727	18337990	18341436	-	-	157566119	157568985
SMS	21940573	21994837	18423545	18477918	18118332	18169396	157443852	157492046
PHEX	22032327	22251310	18503662	18725404	18199396	18420985	157162075	157415286
ZNF645	22272913	22274461	-	-	-	-	-	-
DDX53	22999961	23002089	19497659	19510658	19164076	19169280	-	-	Lost in Myomorpha
PTCHD1	23334370	23404374	19830356	19883291	19508501	19563298	155569736	155624178
LOC101097703	-	-	20032463	20032949	-	-	-	-
LOC101092829	-	-	20037757	20038541	-	-	-	-
PRDX4	23664260	23686399	20117734	20140798	19800153	19819575	155323918	155340749
ACOT9	23701055	23743290	20147901	20174189	19835674	19864570	155262443	155297654
SAT1	23783158	23786223	20204990	20208126	19908037	19910553	155213126	155216449
Cldn34b2	-	-	-	-	-	-	155124917	155147849
Cldn34b1	-	-	-	-	-	-	154886803	154913643
Gm15142	-	-	-	-	-	-	154635586	154639130
Samt2	-	-	-	-	-	-	154575228	154579330
Samt4	-	-	-	-	-	-	154482002	154484682
Gm5646	-	-	-	-	-	-	154398215	154402162
4930524N10Rik (Samt2b)	-	-	-	-	-	-	154339225	154343392
Gm5645	-	-	-	-	-	-	154130867	154134052
Gm15140 (Samt1d)	-	-	-	-	-	-	154109633	154120685
Gm5947	-	-	-	-	-	-	154079612	154082604
Gm15143 (Sam2-like)	-	-	-	-	-	-	154065195	154069350
Gm10057 (Samt1c)	-	-	-	-	-	-	154043986	154055041
4921511M17Rik (Samt1d)	-	-	-	-	-	-	154022780	154033827
Samt1	-	-	-	-	-	-	154001590	154012640
Gm8787	-	-	-	-	-	-	79330513	79358068
Tsga8	-	-	-	-	-	-	83486674	83487924
Samt3	-	-	-	-	-	-	86044199	86047313
4930415L06Rik (PPP4RBL3like)	-	-	-	-	-	-	89930097	89932852
Gm5072 (Mageb6b1)	-	-	-	-	-	-	91392500	91393534
Gm14781 (Mageb5b)	-	-	-	-	-	-	91624249	91635671
LOC108168446 (Mageb2L)	-	-	-	-	-	-	91625353	91626477
Mageb1	-	-	-	-	-	-	92015191	92016333
AU015836	-	-	-	-	-	-	93968656	93975470
Mouse Ampliconic	-	-	-	-	-	-	94706195	94816711
APOO	23833348	23907940	20247999	20304786	19953147	20017784	94367011	94417093
CXorf58	23907932	23939520	20304897	20329696	20020746	20051819	94339903	94366937
KLHL15	23983716	24027186	20375326	20410641	20088208	20130452	94234512	94277724
EIF2S3	24054948	24078810	20423874	20442946	20129708	20162881	94188709	94212651
ZFX	24148994	24216255	20504073	20557450	20220812	20273689	94074631	94150645
SUPT20HL2	24310862	24313315	-	-	-	-	-	-
SUPT20HL1	24362761	24365424	-	-	-	-	-	-
LOC100156694	-	-	-	-	20366396	20433395	-	-	Ancestral
PDK3	24465227	24550466	20750649	20816368	20486205	20598492	93764616	93832095
PCYT1B	24558087	24672862	20833107	20968217	20605769	20743081	93654863	93749951
LOC102167889 (RNF168)	-	-	-	-	20654157	20659555	-	-	Ancestral
POLA1	24693833	24996986	20981713	21286059	20756674	21064265	93304766	93632219
ARX	25003694	25015948	21292456	21310887	21067631	21079850	93286507	93298357
MAGEB18	26138343	26140736	22115373	22265770	22082917	22084040	92118879	92599572
MAGEB6	26192440	26195646	-	-	22126833	22128116	91331905	91332897
LOC100513448 (MAGEB4L)	-	-	-	-	22170175	22171346	-	-
FELCATV1R3	-	-	21603090	21603992	-	-	-	-
LOC105261400 (MAGEB4L)	-	-	22294290	22295724	-	-	-	-
LOC111558670 (MAGEB17L)	-	-	22330125	22331507	-	-	-	-
MAGEB5	26216169	26218270	22344146	22344812	22172038	22176128	91779608	91782976
LOC493792 (MAGEB5L)	-	-	22348237	22356721	22188608	22189561	90878355	90893134
PPP4R3C	27460211	27463341	23399287	23402011	23301323	23303743	89752268	89755491
LOC100157863 (APOPT1)	-	-	-	-	22381742	22382524	-	-
LOC100514934 (RPL39L)	-	-	-	-	23259680	23259840	-	-
DCAF8L2	27746809	27748821	-	-	23566754	23569786	89403848	89409689
MAGEB10	27807990	27823014	23698094	23702151	23618483	23621851	-	-	Lost in Mouse (putative progenitor of Magea1 subfamily)
MAGEB10L	-	-	23710261	23711978	23629744	23632620	-	-
LOC100156962 (MAGEB10L)	-	-	-	-	23652358	23653374	-	-
LOC102159844 (MAGEB4L)	-	-	-	-	25895424	26030203	-	-
LOC493964 (MAGE)	-	-	23746635	23748892	-	-	-	-
DCAF8L1	27977993	27981449	-	-	-	-	-	-
IL1RAPL1	28587564	29956350	25306986	25850348	24408092	25811129	86747242	88115623
MAGEB2 (duplicate of MAGEB4)	30215558	30220089	-	-	-	-	-	-
LOC109496467 (MAGEB2L)	-	-	26048108	26051768	-	-	-	-
MAGEB3	30230436	30237493	26044607	26067328	26044502	26055412	-	-	Lost in Mouse
MAGEB4	30241940	30244193	26080791	26085676	26044526	26076729	86250256	86256219
MAGEB1(duplicate of MAGEB4)	30243731	30252038	-	-	-	-	-	-
NR0B1	30304422	30309399	26122664	26128750	26117874	26122951	86191775	86195947
LOC109496468	-	-	26201750	26477535	-	-	-	-
CXorf21	30558824	30577916	26387386	26403528	26363808	26384933	85776968	85891499
GK	30653348	30731462	26478457	26558826	26470422	26558892	85701937	85776819
TAB3	30827442	30889394	26647512	26737083	26632547	26729039	85573851	85634469
FTHL17	31071241	31072053	26941234	26942138	26955098	26956111	85249677	85270291	Fthl17a (putative progenitor of Fthl cluster @ 8.8-9.1 Mb)
DMD	31119219	33339609	26985450	28647270	27028223	29650728	82814664	85205050
FAM47A	34129752	34132330	-	-	-	-	-	-
E3-like	-	-	30177585	30184408	30364427	30367647	81419575	81458122
TMEM47	34627064	34657288	30393991	30423872	30584044	30615233	81070644	81097875
FAM47B	34942796	34944917	-	-	-	-	-	-
LOC100623332 (MAGEB16L)	-	-	-	-	31357792	31721181	-	-
LOC100522230 (MAGEB16L)	-	-	-	-	31573305	31574593	-	-
LOC100522411 (MAGEB16L)	-	-	-	-	31592308	31597919	-	-
LOC100623432 (MAGEB16L)	-	-	-	-	31752126	31753755	-	-
LOC100520818 (MAGEB16L)	-	-	-	-	31759602	31780300	-	-
MAGEB16	35798317	35803753	31495157	31498776	30874573	30945913	79623231	79671435
CFAP47	35919734	36385319	31626751	32211210	31879143	32331543	79482568	79517285
LOC105373154 (MIB-like)	36902398	36959104	-	-	-	-	-	-
H2A-Bbd type 1-like	-	-	32536805	32537361	32692523	32693072	-	-
FAM47C	37008359	37011666	32806091	32807733	33004811	33006091	78737763	78739410
PRRG1	37349275	37457295	32713195	33023125	33064499	33232556	78449610	78583912
LOC101081960 (FAM47E-like)	-	-	32806091	32807733	-	-	-	-
4930480E11Rik	-	-	32779211	32780853	33004811	33006091	78369643	78371128
LOC110257841 (H2A-Bbd type 1-like)	-	-	-	-	33299003	33299753	-	-
LOC100624295 (H2A-Bbd type 1-like)	-	-	-	-	33307648	33308398	-	-
LANCL3	37571569	37684463	33204241	33300007	33426731	33543506	9199973	9268085	.
XK	37685766	37732130	33309747	33373149	33544287	33602576	9272784	9313245
LOC111558783	-	-	33715045	33716293	-	-	-	-
H2al1m	-	-	-	-	-	-	9283764	9284288
H2al1k	-	-	-	-	-	-	9350599	9351137
CYBB	37780017	37813461	33407630	33441764	33654656	33678346	9435252	9487766
H2al1o	-	-	-	-	-	-	9571960	9572391
DYNLT3	37838836	37847636	33466633	33474399	33711993	33724596	9654270	9662983
SYTL5	37888915	38128820	33528891	33868132	33798296	34066127	9747559	9998864
HYPM	37990817	37991317	33656548	33657115	33889233	33890290	9846947	9847500
LOC100736633 (H2A-Bbd type 1-like)	-	-	-	-	33894983	33895366	-	-
H2al3	-	-	-	-	-	-	9849703	9850252
SRPX	38149335	38220924	33887253	33999366	34075577	34198462	10037977	10117661
RPGR	38269163	38327564	34009091	34091722	34238961	34522814	10158216	10216795
OTC	38352483	38421450	34114702	34176852	34322398	34391711	10252296	10321024
LOC101083747 (FTL-like)	-	-	34233030	34301049	-	-	-	-
TSPAN7	38561478	38688918	34301069	34426785	34522899	34660216	10485116	10596604
MID1IP1	38801432	38806532	34507784	34510124	34763360	34766160	10717365	10719702
H2al1a	-	-	-	-	-	-	11299257	11299757
H2a1b	-	-	-	-	-	-	11302432	11302921
H2a1c	-	-	-	-	-	-	11305655	11305972
H2a1d	-	-	-	-	-	-	11308824	11309141
H2al1e	-	-	-	-	-	-	11311934	11312427
H2a1f	-	-	-	-	-	-	11315158	11315475
H2a1g	-	-	-	-	-	-	11318256	11318764
H2a1h	-	-	-	-	-	-	11321453	11321894
H2a1i	-	-	-	-	-	-	11324659	11324976
H2a1j	-	-	-	-	-	-	11327822	11328151
BCOR	40051246	40177390	35553906	35667113	35768013	35891013	12036737	12160528
LOC107985687 (EIF2L)	40101736	40106486	-	-	-	-	-	-
LOC106506945 (SRRM1L)	-	-	-	-	35880111	35904287	-	-
LOC110257671	-	-	-	-	36042052	36140080	-	-
ATP6AP2	40580964	40606637	35998840	36022168	36271154	36300240	12587759	12617051
MPC1L	40623566	40624139	36047183	36047909	36325447	36331779	-	-	Lost in Murid rodents
CXorf38	40626921	40647678	36053143	36070509	36330684	36351903	12654879	12675377
MED14	40649543	40736122	36073004	36140142	36354057	36424837	12675371	12762106
MED14OS	40735396	40738701	36140026	36322804	-	-	-	-	Lost in Rodentia/Myomorpha
USP9X	41085420	41236579	36468689	36600315	36736049	36888702	13070995	13173328
DDX3X	41333308	41364472	36692615	36709300	36988031	37005496	13280496	13293988
NYX	41447460	41476414	36811942	36815278	37080197	37105513	13461095	13489321
CASK	41514934	41923525	36873963	37231098	37166973	37535723	13517080	13846784
LOC110257750	-	-	-	-	37168973	37172889	-	-
GPR34	41686543	41697277	37019412	37028115	37306490	37313626	13623413	13640859
GPR82	41724155	41730135	37043022	37050814	37328672	37334144	13658153	13667433
PPP1R2C	42777368	42778247	37939419	37940234	38292829	38293616	-	-	Lost in Rodentia
H2al1n	-	-	-	-	-	-	14211148	14211657
Cypt1	-	-	-	-	-	-	16522869	16523691
MAOA	43654907	43746824	38678878	38753693	38930452	39006220	16619698	16687812
MAOB	43766610	43882475	38771527	38883359	39025973	39144389	16709281	16817366
NDP	43948776	43973675	38955577	39007128	39208115	39235879	16885521	16911774
EFHC2	44146254	44343677	39153012	39354250	39407390	39597537	17132049	17320470
FUNDC1	44523639	44542975	39512092	39524321	39726194	39737663	17519967	17572325
DUSP21	44844003	44844888	39730375	39731680	39929707	39930539	18145870	18146694
KDM6A	44873175	45112612	39755473	39964497	39953764	40154197	18162364	18279936
CXorf36	45148373	45200901	40004152	40050710	40179289	40223011	18414167	18461421
KRBOX4	46447292	46473669	-	-	-	-	-	-
ZNF674	46497725	46545459	41018787	41054470	41090146	41118627	-	-	Lost in Rodentia
Tex13c3	-	-	-	-	-	-	19479424	19481319
CHST7	46573687	46598496	41100069	41123712	41192993	41234654	20058962	20097524
SLC9A7	46599251	46759172	41124622	41258910	41233308	41399032	20098851	20291968
4930453H23Rik	-	-	-	-	-	-	21206580	21221672
SPACA5	48004336	48009736	42409591	42414886	42476719	42478783	21068488	21077959
ZNF630	48058178	48071658	42477498	42489032	42518203	42540677	-	-
SPACA5B (SPACA5 dup)	48130657	48132613	-	-	-	-	-	-
SSX5	48177982	48196798	42520453	42529113	-	-	8803691	8811422
SSX1	48255317	48267444	-	-	42559714	42567979	-	-
SSX3	48346428	48356753	-	-	-	-	-	-
SSX4	48383527	48393343	-	-	-	-	-	-
SSX4B	48402082	48411910	-	-	-	-	-	-
4930402K13Rik (Fam47c duplicate)	-	-	-	-	-	-	9104562	9106342
Fthl17f	-	-	-	-	-	-	9063090	9063822
Fthl17e	-	-	-	-	-	-	9033486	9034333
Fthl17d	-	-	-	-	-	-	8985940	8986672
Fthl17c	-	-	-	-	-	-	8975718	8976559
Fthl17b	-	-	-	-	-	-	8962134	8962975
Gm5751	-	-	-	-	-	-	8871568	8875407
Gm6592	-	-	-	-	-	-	8843994	8849607
Ssx9	-	-	-	-	-	-	8743792	8756633
Ssxb8	-	-	-	-	-	-	8684843	8690891
Ssxb7	-	-	-	-	-	-	8639607	8645722
Ssxb3	-	-	-	-	-	-	8583404	8591810
Ssxb6	-	-	-	-	-	-	8542604	8548255
Gm14459	-	-	-	-	-	-	8513543	8526726
Mouse Ampliconic	-	-	-	-	-	-	8480304	8499226
Ssxb2	-	-	-	-	-	-	8454343	8461726
Ssxb1	-	-	-	-	-	-	8413305	8422158
Ssxb9	-	-	-	-	-	-	8366978	8375388
Ssxb10	-	-	-	-	-	-	8327424	8336235
SLC38A5	48458537	48470256	42542894	42556336	42590608	42601537	8271381	8280179
FTSJ1	48476021	48486364	42558510	42568355	42609560	42620198	8238668	8252406
PORCN	48508954	48520814	42609404	42621227	42653696	42669526	8193846	8206546
EBP	48521776	48528716	42621642	42627809	42670592	42678571	8185329	8193512
TBC1D25	48539687	48562609	42629300	42643675	42682267	42696579	8154470	8176181
RBM3	48574353	48581165	42649115	42652699	42704019	42707587	8138975	8145880
WDR13	48597492	48605194	42676938	42684386	42715097	42730200	8123301	8132858
WAS	48683753	48691427	42762176	42769991	42774597	42793055	8081466	8090491
SUV39H1	48695554	48709016	42772957	42787745	42797309	42811457	8061171	8074760
GLOD5	48761572	48773648	42849411	42856694	42877034	42889285	8004201	8018492
GATA1	48786540	48794311	42869200	42876230	42898431	42905939	7959260	7976682
HDAC6	48801377	48824982	42882388	42907640	42917911	42941894	7930116	7948016
ERAS	48826513	48829869	42911194	42912456	42942033	42946715	7924276	7928607
PCSK1N	48831092	48835638	42913359	42918849	42947688	42952222	7919822	7924410
TIMM17B	48893447	48898143	42934754	42938904	42970586	42976287	7899336	7907652
PQBP1	48897862	48903145	42939002	42943027	42976086	42981732	7894519	7899269
SLC35A2	48903180	48911958	42943085	42952110	42981801	42992091	7884034	7894492
PIM2	48913182	48919136	42953321	42958424	42993547	42998575	7878306	7883432
OTUD5	48922024	48958386	42961370	42989526	43001491	43029471	7841346	7876626
KCND1	48960983	48972099	42992646	43000905	43032355	43043310	7823759	7838278
GRIPAP1	48973720	49002264	43002742	43025187	43043613	43070363	7789961	7820567
TFE3	49028726	49043517	43058578	43069912	43100375	43116377	7762537	7775202
CCDC120	49053432	49069858	43080572	43095328	43128938	43146777	7731714	7741324
PRAF2	49071156	49074045	43095756	43098628	43147473	43150350	7728571	7731063
WDR45	49074433	49101121	43099014	43104375	43150691	43155981	7721983	7728201
GPKOW	49113385	49124547	43135734	43150338	43177264	43192021	7697125	7710265
LOC101100947	-	-	43155241	43156457	-	-	-	-
MAGIX	49162569	49168157	43162395	43164969	43206680	43212889	7673166	7681251
PLP2	49171837	49175120	43170158	43173070	43215372	43218318	7667941	7671390
PRICKLE3	49174802	49186400	43173074	43181974	43218271	43230368	7657379	7668186
SYP	49187812	49200202	43183484	43195596	43232190	43246764	7638580	7653256
CACNA1F	49205063	49233404	43199073	43224148	43250449	43284458	7607070	7635196
CCDC22	49235467	49250526	43225463	43238774	43285232	43303865	7593809	7605420
FOXP3	49250436	49266505	43238706	43258046	43303777	43328164	7579676	7595243
PPP1R3F	49269822	49301465	43257562	43273534	43328199	43344503	7558562	7574281
GAGE10	49303646	49319844	43301195	43309471	-	-	-	-	Lost in Rodentia
GAGE12J	49322030	49329387	-	-	-	-	-	-
GAGE13	49331603	49338952	-	-	-	-	-	-
GAGE12B	49341183	49529921	-	-	-	-	-	-
GAGE12C	49532177	49539541	-	-	-	-	-	-
GAGE12D	49541722	49549107	-	-	-	-	-	-
GAGE12E	49551289	49558649	-	-	-	-	-	-
GAGE12F	49560808	49568208	-	-	-	-	-	-
GAGE12G	49570400	49577757	-	-	-	-	-	-
GAGE12H	49579949	49587304	-	-	-	-	-	-
GAGE2A	49589515	49596827	-	-	-	-	-	-
GAGE1	49598992	49608536	-	-	-	-	-	-
PAGE1	49687450	49696019	-	-	-	-	-	-
PAGE4	49829260	49834264	43326348	43477639	43489559	43496654	-	-	Lost in Rodentia
USP27X	49879867	49882565	43522383	43529533	43553454	43557247	7372591	7375830
CLCN5	49922615	50099235	43585188	43756913	43779016	43809472	7153810	7319359
AKAP4	50190768	50201013	43853295	43870024	43885584	43895142	7067515	7078609
CCNB3	50202713	50351914	43887036	43953628	43922729	43988939	6979652	7041635
DGKK	50365407	50470850	43989970	44153190	44001172	44180142	6779306	6948363
SHROOM4	50575534	50814167	44264584	44536255	44301956	44543969	6399940	6637454
BMP15	50910735	50916641	44647167	44651874	44613122	44620575	6314106	6320723
NUDT10	51332231	51337525	44778621	44784673	44773570	44779568	6168696	6173044
CXorf67	51406915	51408838	44899033	44904207	44858057	45074373	6081218	6083420
NUDT11	51490011	51496607	44938000	44944519	44912160	44918977	6047507	6054751
CENPVL3	51619054	51711363	45031631	45032701	-	-	-	-
CENPVL2	51681212	51682831	-	-	-	-	-	-
CENPVL1	51710512	51712131	-	-	-	-	-	-
LOC101088142	-	-	45159982	45161014	-	-	-	-
Btbd35f7	-	-	-	-	-	-	5669067	5671026
Mycs	-	-	-	-	-	-	5466904	5469265
Btbd35f27	-	-	-	-	-	-	4952135	4954077
Btbd35f4	-	-	-	-	-	-	4800411	4802359
Btbd35f17	-	-	-	-	-	-	4370636	4372595
Btbd35f20	-	-	-	-	-	-	4289286	4291245
Btbd35f28	-	-	-	-	-	-	4196576	4198535
Btbd35f3	-	-	-	-	-	-	4037674	4039622
Btbd35f16	-	-	-	-	-	-	3955043	3957002
Btbd35f10	-	-	-	-	-	-	3750931	3752885
Btbd35f18	-	-	-	-	-	-	3700233	3702192
Btbd35f11	-	-	-	-	-	-	3441731	3443690
Btbd35f23	-	-	-	-	-	-	3076920	3078823
GSPT2	51743385	51746232	45253096	45255645	45193336	45195939	94636069	94638562
MAGED1	51802998	51902354	45393059	45399825	45258761	45329282	94535474	94542074
MAGED4B	52061827	52069272	-	-	-	-	-	-
MAGED4	52184823	52192268	45397058	45397769	-	-	-	-	Lost in Myomorph rodents
XAGE2	52368996	52375683	-	-	-	-	-	-
XAGE1B	52495668	52500815	-	-	-	-	-	-
XAGE1E (XAGE1E)	52512074	52517221	-	-	-	-	-	-
SSX7	52644061	52654900	-	-	-	-	-	-
SSX2	52696896	52707227	-	-	-	-	-	-
SSX2B	52751204	52761536	-	-	-	-	-	-
SPANXN5	52796146	52797348	-	-	-	-	-	-
XAGE5	52811295	52818301	-	-	-	-	-	-
XAGE3	52862528	52868140	-	-	-	-	-	-
FAM156B	52891599	52908560	-	-	-	-	-	-
Gm15093 (Ott-like duplicate)	-	-	-	-	-	-	149272377	149305003	Muridae+ Cricetidae
Gm15085 (Ott-like duplicate)	-	-	-	-	-	-	149447617	149487784	Muridae+ Cricetidae
Gm10439	-	-	-	-	-	-	149594601	149636621	Muridae+ Cricetidae
Gm15097 (Ott-like duplicate)	-	-	-	-	-	-	149784424	149826694	Muridae+ Cricetidae
Gm15091 (Luzp4-like duplicate)	-	-	-	-	-	-	149941387	149984982	Muridae+ Cricetidae
Gm20153	-	-	-	-	-	-	150157426	150177319	Muridae+ Cricetidae
Gm15104	-	-	-	-	-	-	150311924	150336719	Rodentia
FAM156A	52947254	52995472	Xrand	Xrand	45643214	45643750	150397773	150467331	Unclear positional orthology
LOC111558733	-	-	45393095	45399288	-	-	-	-
LOC102899730	-	-	44806692	44814275	-	-	-	-	Lost in Rodenta
Mouse Ampliconic	-	-	-	-	-	-	152409657	152438240
GPR173	53049324	53080615	45560596	45584348	45883738	45908197	152343598	152368966
TSPYL2	53082327	53088546	45586686	45593707	45909688	45916859	152336852	152342503
KDM5C	53159735	53225422	45649393	45682111	45968812	46003215	152233197	152279102
IQSEC2	53225784	53321350	45691037	45766467	46011386	46094978	152144183	152225237
SMC1A	53374149	53422728	45806390	45853337	46143738	46202187	152016428	152061973
RIBC1	53422782	53431120	45853491	45868530	46202213	46218691	152004580	152016995
HSD17B10	53431258	53434376	45868668	45871157	46218540	46220942	152001896	152004442
HUWE1	53532096	53686729	45953555	46120114	46281958	46444315	151800807	151935417
L1TD1	-	-	-	-	46349921	46352855	-	-
LOC106506967 (SMC1AL)	-	-	-	-	46568746	46570505	-	-
31J21-174L20_Transcript1	-	-	46642669	46837270	-	-	-	-
Cat Ampliconic	-	-	46377258	46394033	-	-	-	-
PHF8	53936680	54048935	46453867	46551849	46648164	46761192	151520624	151633859
FAM120C	54068324	54183281	46587186	46707794	46777904	46904232	151342932	151474136
WNK3	54192823	54358695	46715598	46904682	46923587	47096265	151168778	151320194
TSR2	54440420	54445297	46995684	47000708	47186610	47192465	151087094	151096543
FGD1	54445454	54496166	47000856	47043053	47191838	47231656	151046118	151089686
GNL3L	54530211	54567287	47070125	47096193	47256467	47284520	150983133	151017322
Pig Ampliconic	-	-	-	-	47435127	47474791	-	-
ITIH6	54748899	54798240	-	-	47537909	47584419	150826917	150857407
LOC106506966	-	-	-	-	47552766	47561116	-	-
MAGED2	54807599	54816015	47361618	47369879	-	-	150806421	150814340
TRO	54920563	54931436	47489751	47500111	47759334	47772014	150644710	150657583
PFKFB1	54933134	54998534	47501461	47638027	47771751	47859079	150588258	150643878
APEX2	55000323	55007873	47639303	47648660	47862682	47870579	150503629	150588208
ALAS2	55009055	55031064	47649435	47676059	47871519	47896041	150547417	150570622
PAGE2B	55027927	55078903	-	-	47916076	47919904	-	-	Lost in Glires
PAGE2	55089052	55092836	-	-	-	-	-	-
FAM104B	55143102	55161195	-	-	-	-	-	-	Lost in many laurasiatheres and Muridae
MTRNR2L10	55181391	55182511	-	-	-	-	-	-
PAGE5	55220347	55224108	-	-	-	-	-	-
PAGE3	55257833	55264916	-	-	-	-	-	-	Lost in many laurasiatheres and Glires
Cat Ampliconic	-	-	47827412	48044461	-	-	-	-
Pig Ampliconic	-	-	-	-	48022185	48041616	-	-
MAGEH1	55452089	55453568	48015477	48016899	48080533	48081983	153036166	153037563
USP51	55484524	55489875	47941397	47945456	48047658	48051941	153006379	153009913
FOXR2	55623400	55626188	-	-	48174318	48181106	153114581	153132861
RRAGB	55717677	55760209	48135197	48186392	48286584	48330196	153139792	153190192
KLF8	55908123	56291531	48315692	48532082	48663063	48752359	153225339	153397886
UBQLN2	56563593	56567010	48830015	48832416	48948062	48951392	153498232	153501562
Cypt3	-	-	-	-	-	-	153558593	153559435	Mus-specific gene gain
Kctd12b	-	-	-	-	-	-	153685154	153696386
NBDY	56729219	56819178	48956918	49068891	49156877	49230907	153723554	153741296
SPIN3	56976370	56995801	-	-	49351952	49356901	-	-	Lost in Rodentia
FCAB-205P3...127P13_Transcript1			49065362	49066904
SPIN2B	57112142	57121905	49501971	49515986	49492205	49507749	153832001	153834243
FAAH2	57121861	57489196	-	-	49685285	49744246	-	-	Lost in Muridae
SPIN2A	57134259	57138688	-	-	-	-	-	-
LOC100511853 (GMCL-like)	-	-	-	-	49726706	49729782	-	-
ZXDB	57591836	57597477	49633997	49639386	49787449	49790835	94724569	94730191
LOC110257675 (GMCL1L1)	-	-	-	-	49845934	49893816	-	-	Ancestral
LOC110257676 (GMCL1L1)	-	-	-	-	49896930	49898438	-	-	Ancestral
LOC109496524 (ZXDB-like)	57905430	57910633	49918314	49932354	-	-	-	-
ZXDA	57905430	57910633	-	-	-	-	-	-
LOC105260211 (YBX3-like)	-	-	50184537	50192765	-	-	-	-
Human Ampliconic	58716337	58846090	-	-	-	-	-	-
Human Ampliconic	59467608	59975932	-	-	-	-	-	-
Human Ampliconic	61974100	61984719	-	-	-	-	-	-
Human Ampliconic	63129000	63224416	-	-	-	-	-	-
Cat Ampliconic	-	-	52226362	52283778	-	-	-	-
SPIN4	63347228	63351339	52473485	52477463	49976956	49981312	95022507	95026682
ARHGEF9	63634967	63786025	52963931	53164433	50159912	50578020	95048930	95196851
AMER1	64185117	64205744	53458527	53473470	50842049	50864105	95420313	95444840
ASB12	64224192	64230631	53486536	53507871	50877158	50883739	95469407	95557993
MTMR8	64268081	64395453	53507824	53609827	50931199	51077796	-	-	Lost in Rodentia
LOC101101369 (profilin-1-like)	-	-	53624735	53625193	51081399	51081860	-	-
LOC109496915	-	-	54062494	54069862	-	-	-	-
ZC4H2	64915802	65034744	54260153	54295599	51157102	51193993	95639187	95658509
ZC3H12B	65034815	65507887	54375143	54862695	51231526	51749627	95711558	95932656
LAS1L	65512582	65534806	54866582	54886031	51753600	51773416	95920045	95956974
MSN	65588382	65741931	55048437	55113643	51844197	51967674	96096045	96168553
Pig Ampliconic	-	-	-	-	51972371	52070728	-	-
VSIG4	66021738	66040125	55350442	55387149	52175601	52198635	96247203	96293438
Hsf3	-	-	-	-	-	-	96306178	96456294	Ancestral X linked gene found on opossum X, lost in afrotheria, laurasiatheria, many primates. Orthologs in lemur, armadillo, rabbit.
HEPH	66162526	66267389	55543588	55635558	52314911	52397384	96455436	96574485
Gpr165	-	-	-	-	-	-	96713468	96719388	Ancestral gene lost in Carnivora, Primates, Cetartiodactyla, retained in opossum, microbat, orangutan and rabbit
Pgr15l	-	-	-	-	-	-	97072596	97082104
EDA2R	66594384	66639303	55784554	55828158	52522231	52533080	97333837	97377218
Pig Ampliconic	-	-	-	-	52611043	52622268	-	-
AR	67544032	67730619	56620255	56800654	53609113	53806778	98148757	98323218
OPHN1	68042344	68433841	57059481	57663388	54056504	54617045	98554280	98891414
LOC102899556 (GCSH-like)	-	-	57485494	57490985	-	-	-	-
YIPF6	68498374	68572413	57709727	57752221	54661771	54687988	98936321	98949021
STARD8	68647669	68725842	57812722	57900017	54773189	54856716	99003228	99074728
LOC109496376	-	-	57970243	57974928	-	-	-	-
EFNB1	68828997	68842164	57986453	57999507	54947339	54961403	99136061	99149022
LOC105373242	69031120	69084509	-	-	-	-	-	-
PJA1	69160738	69165522	58298834	58303483	55274294	55280583	99465734	99471268
FAM155B	69505204	69532508	58644685	58676144	55631149	55658309	99821069	99846345
EDA	69616067	70039472	58757904	59204249	55770958	56103296	99975606	100400760
AWAT2	70040542	70049970	59205127	59213860	56101635	56108243	100402221	100494221
OTUD6A	70062491	70064179	59236192	59237277	56134479	56137096	100429013	100429885
IGBP1	70133449	70166324	59275080	59309993	56173773	56206121	100494291	100516125
DGAT2L6	70177483	70205703	59322204	59347375	56212494	56239641	100524838	100546108
AWAT1	70233489	70240661	59370580	59376856	56263082	56273169	100572247	100578206
P2RY4	70258166	70259804	59396514	59400465	56284736	56285833	100588358	100594927
ARR3	70268335	70281840	59412040	59425746	56295107	56310507	100605480	100618953
RAB41	70280978	70285088	-	-	-	-	-	-	Ancestral
PDZD11	70286361	70290040	59411828	59434174	56316181	56319424	100622880	100625974
KIF4A	70290029	70420924	59434215	59556125	56319453	56447560	100626065	100727271
GDPD2	70423031	70433391	59557800	59568435	56449430	56460399	100729835	100738901
LOC105373244	70427358	70436800	-	-	-	-	-	-
DLG3	70444850	70505490	59579669	59638005	56471941	56531481	100767408	100818410
TEX11	70511227	70908717	59654439	59901791	56543933	56925104	100838648	101059639
SLC7A3	70925579	70931125	59914312	59921327	56937081	56942331	101079204	101090452
SNX12	71059247	71073426	60052457	60062644	57099521	57108636	101089367	101222583
FOXO4	71096149	71103534	60083959	60091262	57132549	57140377	101254259	101260873
CXorf65	71103865	71106973	60091744	60094037	57139975	57143070	101261373	101263992
IL2RG	71107404	71111631	60094386	60098110	57143568	57151242	101264385	101268255
MED12	71118556	71142454	60100209	60123483	57150884	57174367	101274091	101298934
NLGN3	71144389	71175307	60125274	60147414	57174506	57204770	101299179	101321350
GJB1	71215212	71225215	60187018	60194732	57241990	57249496	101376376	101385629
ZMYM3	71239624	71255261	60209302	60225237	57261923	57279427	101404384	101421185
NONO	71283192	71301168	60239620	60254999	-	-	101429651	101448593
ITGB1BP2	71301275	71305371	60255122	60285633	57316490	57321614	101449109	101453541
LOC101093337 (RHOG-like)	-	-	60293188	60301879	57368101	57380102	-	-
TAF1	71366220	71530525	60308017	60391809	57382211	57466700	101527572	101601789
Pig Ampliconic	-	-	-	-	57640099	57657993	-	-
LOC100621166 (CXORF49L)	-	-	-	-	57678534	57682641	-	-
OGT	71533062	71575897	60451062	60487425	57521091	57558467	101640011	101684351
GCNA	71578024	71613583	60489234	60516655	57580582	57588938	-	-	Lost in Glires
CXCR3	71615913	71618517	60520310	60523136	57592032	57595706	101731535	101734147
CXORF49L	71667702	71671524	-	-	57640600	57644707	101790332	101794456
CXorf49	71714374	71718285	60570912	60574857	57694208	57698314	101794538	101798658
CXorf49B	71763290	71767201	-	-	-	-	-	-
Gm3858	-	-	-	-	-	-	101818196	101821816
NHSL2	71911073	72153286	60805444	60880236	57741172	58028266	101848669	102092055
RGAG4	72127110	72131901	60854161	60858989	58008195	58012965	102066542	102071378
FLJ44635	72144184	72161750	-	-	-	-	-	-
PIN4	72181676	72263964	60903822	60916171	58069758	58082243	102119465	102127673
ERCC6L	72204657	72239008	60919637	60955539	58087216	58117942	102142820	102157091
RPS4X	72272603	72277291	60987392	60992882	58149302	58155179	102184941	102189391
CITED1	72301638	72307187	61013956	61019473	58179084	58184778	102247378	102252181
HDAC8	72329516	72573103	61039856	61264022	58210182	58450681	102284638	102507710
PHKA1	72578814	72714181	61268402	61444425	58456097	58583216	102513975	102644286
Gm9112	-	-	-	-	-	-
DMRTC1B	72777170	72848802	-	-	-	-	102707881	102715209
FAM236B	72781865	72782660	-	-	-	-	102706888	102707670
FAM236D	72807425	72808819	-	-	-	-	-	-
DDX46L	-	-	61407550	61411377	-	-	-	-
LOC111558754 (DMRTC1L)	-	-	61526210	61555173	58696808	58697585	-	-
LOC102632256 (Dmrtc1-like)	-	-	-	-	-	-	102764035	102779496
Dmrtc1c1	-	-	-	-	-	-	102797880	102809950
Dmrtc1c2	-	-	-	-	-	-	102847631	102857207
1700031F05Rik (Dmrtc1-like)	-	-	-	-	-	-	102859166	102866353
LOC102632367 (Dmrtc1-like)	-	-	-	-	-	-	102880507	102882317
DMRTC1	72872025	72943653	61843480	61872443	58697841	58700520	102903216	102934004
PABPC1L2B (Hominin-sp. duplicate)	73003513	73005712	-	-	-	-	-	-
ENSSSCG00000031328 (DMRTC1L)	-	-	-	-	58717308	58719987	-	-	Ancestral
PABPC1L2B	-	-	61640743	61643944	58830345	58832606	-	-
FCAB-256L9_Transcript			62018443	62022998
PABPC1L2A	73077338	73079512	61641145	61641802	58851255	58852978	-	-	Lost in Muridae
LOC111558674 (FOXD1-like)	-	-	61637941	61640845	-	-	-	-
LOC100525624 (NAP1L2L)	-	-	-	-	58941164	58951122	-	-
Mouse Ampliconic	-	-	-	-	-	-	103003108	103016033
NAP1L2	73212299	73214874	61811430	61813029	58969577	59176807	103184059	103186664
CDX4	73447254	73454585	-	-	59089131	59100958	103321398	103330224
CHIC1	73563045	73687109	61929721	62010337	59176650	59230332	103356337	103409092
ZCCHC13	74304190	74305034	62386632	62387909	59613770	59615086	103630586	103631664
SLC16A2	74421493	74533929	62526850	62675075	59748685	59861018	103697414	103821988
RLIM	74582976	74614626	62704700	62730985	59889799	59920464	103957165	103981296
NEXMIF	74732856	74925452	62788888	62950944	59967712	60013938	104076761	104201362
ABCB7	75053172	75156340	63088439	63256434	60186559	60313098	104280565	104413846
LOC111558772 (PNN-like)	-	-	63241162	63244249	-	-	-	-
UPRT	75156296	75304897	63318247	63385827	60426955	60448174	104482782	104506262
ZDHHC15	75368427	75523626	63428180	63671513	60485559	60585192	104536969	104671090
MAGEE2	75782988	75785244	63749639	63751954	60707490	60711883	104854952	104857267
Cat Ampliconic	-	-	63864134	63877784	-	-	-	-
PBDC1	76172929	76178310	63907385	63911945	60907393	60915607	105079756	105117094
MAGEE1	76427653	76431353	-	-	-	-	105120378	105123961
Cypt2	-	-	-	-	-	-	105499772	105500639
Pig Ampliconic	-	-	-	-	61474449	61484687	-	-
FGF16	77447675	77456522	64791844	64800999	61551487	61561807	105764477	105776532
ATRX	77504878	77786269	64827887	65143134	61584028	61872341	105797615	105929406
MAGT1	77826364	77895568	65156787	65217601	61894237	61958511	105968084	106011899
COX7B	77899464	77905384	65223730	65229156	61962383	61969011	106015700	106022450
ATP7A	77910656	78050395	65233572	65409680	61972544	62110058	106027224	106128160
PGAM4	77967961	77969638	-	-	-	-	-	-
PGK1	78104169	78126827	65486921	65509018	62187472	62210321	106187100	106203699
TAF9B	78129748	78139682	65512547	65521219	62214331	62228782	106206874	106221158
FND3C2	-	-	65542185	65602069	-	-	106235246	106255372
CYSLTR1	78271468	78327691	65713500	65762905	62380778	62407736	106576509	106603679
Gm5127	-	-	-	-	-	-	106583151	106710557	Ancestral, X linked in opossum, extensive gene loss across placentals.
ZCCHC5	78656069	78659328	66042279	66043832	62725700	62727236	106837082	106840643
LPAR4	78747658	78758714	66043832	66172123	62862158	62876184	106920625	106933899
P2RY10	78945332	78963727	66391810	66408572	63112517	63128280	107088437	107104974
P2RY10B	-	-	66480128	66481345	-	-	107148927	107173661
GPR174	79170972	79172229	66603784	66634857	63288948	63327621	107255878	107296771
ITM2A	79360384	79367552	66751624	66758506	63430020	63437027	107397195	107403360
TBX22	80014730	80035828	67287228	67295619	63837576	63845704	107667964	107688980
Cat Ampliconic	-	-	67388619	67405477	-	-	-	-
2610002M06Rik	-	-	-	-	-	-	107782751	107816334	Ancestral, X linked in opossum, extensive gene loss across placentals.
FAM46D	80335504	80445311	67621607	67706824	64120229	64122912	107792590	107872911
Gm732 (Wmp)	-	-	-	-	-	-	107945735	107948436
BRWD3	80669488	80809736	67968842	68208551	64239640	64403889	108737227	108834362
HMGN5	81113701	81201942	68447432	68472546	64541310	64617345	109004537	109013380
SH3BGRL	81201804	81298547	68515747	68603212	64617350	64709006	109095407	109162467
SH3BGRL3-like	-	-	68626417	68630019	-	-	-	-
LOC109496330	-	-	70389127	70389574	-	-	-	-
Gm6377	-	-	-	-	-	-	109196756	109200445	Ancestral, extensive gene loss across placentals, found in horse.
Gm34521	-	-	-	-	-	-	109445438	109558772
Pig Ampliconic	-	-	-	-	65080691	65191728	-	-
POU3F4	83508261	83509767	70688996	70690547	66765044	66766642	110814379	110819108
CYLC1	83861126	83886700	71030416	71113646	66975125	67090165	111110418	111125961
RPS6KA6	84058346	84187935	71211627	71407230	67234684	67415114	111387837	111538097
HDX	84317874	84502578	71558996	71753253	67556764	67713744	111575204	111697079
TEX16	-	-	71856838	72170729	-	-	111896766	112127326	Ancestral gene lost in many primates, pig, but retained in elephant, many laurasiatheres, and rabbit
LOC102901599	-	-	72186990	72264077	-	-	-	-
LOC102899136	-	-	72264803	72269744	-	-	-	-
4933403O08Rik	-	-	-	-	-	-	112171438	112249350	Ancestral gene lost in Primates, cat and pig, but retained in elephant, horse, microbat, and rabbit
APOOL	85003852	85093317	72441194	72544137	68281781	68355009	112311352	112372755
SATL1	85092286	85116229	72561975	72578292	68356415	68383729	112384305	112406779
ZNF711	85243820	85273362	72758696	72786019	68475512	68499329	112600526	112635070
POF1B	85277389	85379743	72790109	72912735	68503170	68579917	112638427	112698711
Cat Ampliconic	-	-	72922860	72993776	-	-	-	-
Pig Ampliconic	-	-	-	-	68586834	68597679	-	-
LOC111558675	-	-	73253100	73258025	-	-	-	-
CHM	85861180	86047565	73377127	73643853	68873882	69066284	113040592	113185539
DACH2	86148451	86832602	73749671	74501842	69137431	69698617	113297510	113836386
KLHL4	87517541	87670050	-	-	70334755	70436299	114474333	114561129
Ube2dnl1	-	-	-	-	-	-	114905012	114905941
Ube2dnl2	-	-	-	-	-	-	114907582	114908510
CPXCR1	88747225	88754785	-	-	71778455	71779240	116448944	116478783
LOC110257684 (DPH3 homolog)	-	-	-	-	71948753	71949100	-	-
Tgif2lx2	-	-	-	-	-	-	118427227	118428258
TGIF2LX	89921941	89922883	75412636	75413920	72894181	72894630	118479708	118480729
PABPC5	91434598	91438584	75741358	75743567	74141707	74145941	119927196	119930165
PCDH11X	91779310	92623230	75956777	76076957	74462811	75191930	120290318	120910622
NAP1L3	93670926	93673683	76574248	76576159	76147190	76149848	122394560	122397385
FAM133A	93673730	93712274	76577434	76628290	76149152	76181971	-	-	Lost in Muridae
TEN1L	-	-	76758100	76758736	-	-	-	-
Cldn34c1	-	-	-	-	-	-	123103523	123145654
Srsx	-	-	-	-	-	-	123220985	123222475
Gm2411 (Cldn34-like)	-	-	-	-	-	-	123346785	123378718
Cldn34c2	-	-	-	-	-	-	123576307	123605024
Cldn34c3	-	-	-	-	-	-	123788212	123823149
Gm5945	-	-	-	-	-	-	124016018	124044356
Vmn2r121	-	-	-	-	-	-	124127339	124135910
4932411N23Rik	-	-	-	-	-	-	126812462	126834004
Gm382	-	-	-	-	-	-	127039972	127063986
Cldn34c4	-	-	-	-	-	-	127721175	127736554
DIAPH2	96684663	97600598	78353951	79365471	78602385	79520441	129749665	130465834
RPA4	96883908	96885467	-	-	-	-	-	-
LOC105373297 (ERVFC1)	97841749	97849381	-	-	-	-	-	-
LOC111558778	-	-	78697269	78703760	-	-	-	-
LOC111558676	-	-	81712294	81717482	-	-	-	-
Pig Ampliconic	-	-	-	-	80370632	80383729	-	-
PCDH19	100291644	100410273	82214215	82357373	82031365	82153159	133582860	133688993
TNMD	100584793	100599885	82507131	82522518	82269323	82292083	133851008	133865577
TSPAN6	100627108	100637104	82553350	82564383	82323634	82328919	133891068	133898429
SRPX2	100644166	100671299	82568218	82591555	82336741	82363868	133908416	133932448
SYTL4	100671964	100732148	82594921	82645532	82367546	82437439	133936385	133981822
CSTF2	100820359	100841520	82805992	82831571	82508739	82540861	134059138	134086822
NOX1	100843324	100874345	82831946	82856068	82540664	82575811	134086421	134137711
XKRX	100886924	100957401	82896374	82912431	82614592	82630188	134149045	134185505
ARL13A	100969011	100990831	82960135	82985651	82670773	82681890	134187501	134208030
TRMT2B	100973358	101052118	82970151	83023539	82638456	82741659	134222955	134277026
TMEM35A	101078847	101096367	83044631	83056640	82761552	82774952	134295225	134305969
CENPI	101098159	101181847	83059323	83138497	82776375	82826651	134308084	134363104
DRP2	101219786	101264497	83122593	83222828	82871901	82925889	134404628	134456574
TAF7L	101268253	101293071	83226090	83243862	82930258	82951065	134460116	134476525
TIMM8A	101345656	101348969	83270951	83273795	82978128	82981038	134537256	134541670
BTK	101349447	101390796	83274416	83298276	82981512	83014475	134542334	134583624
RPL36A	101390890	101396154	83312482	83315000	83018305	83022285	134585654	134588062
GLA	101397791	101408013	83316433	83324120	83024582	83032273	134588169	134601005
HNRNPH2	101408133	101414140	83324295	83330037	83032525	83038369	134601179	134607060
ARMCX4	101418263	101535988	83386524	83421441	83092592	83130725	134685648	134697775
ARMCX1	101550531	101554700	83426259	83430444	83132775	83136924	134717913	134721917
ARMCX6L	-	-	83436552	83448761	-	-	-	-
ARMCX6	101615118	101618001	83460247	83463185	83159108	83160331	134748455	134756666
ARMCX3	101623127	101631910	83468058	83472839	83187939	83192693	134756568	134761457
ARMCX2	101655281	101659891	83505000	83509532	83213939	83218601	134804142	134809221
NXF5	101832112	101857577	83665457	83699310	83338757	83361973	134944526	134964754
ZMAT1	101882288	101932135	83759851	83804476	83396325	83559247	134971372	135009209
TCEAL2	102125688	102127712	83967263	83970685	83577181	83582946	-	-	Lost in Muridae
Gm15023(Prame-like)	-	-	-	-	-	-	135167470	135177653
TCEAL6	102139961	102142416	83944985	83947026	83597173	83599216	135208686	135210687
BEX5	102153707	102156014	83984109	83986278	83607366	83609797	-	-	Lost in non-Sciuromorph Rodentia
NXF2	102247100	102326720	84016447	84043051	-	-	-	-
NXF2B	102360395	102440008	-	-	-	-	-	-
Pramel3	-	-	-	-	-	-	135302289	135312636
Gm5128 (Prame-like)	-	-	-	-	-	-	135373250	135383393
Gm7903 (Prame-like)	-	-	-	-	-	-	135433802	135443997
AV320801(Prame-like)	-	-	-	-	-	-	135494554	135504748
Nxf7	-	-	-	-	-	-	135579555	135598777
Prame	-	-	-	-	83674438	83677130	135612954	135627705
TCP11X2	102460319	102471812	84128018	84133986	83718465	83723365	135654698	135693790
TMSB15A	102513682	102516771	-	-	83744536	83747599	135718667	135725261
LOC111556301 (NFX2-like)	-	-	84197261	84199681	-	-	-	-
ARMCX5	102599168	102604159	84222499	84224469	83746935	83769896	135742692	135747328
GPRASP1	102651366	102659083	84259915	84266266	83765210	83810090	135742692	135803468
GPRASP2	102712176	102717733	84357298	84362149	83811733	83892476	135839034	135844730
BHLHB9	102720714	102752441	84364425	84377094	83895554	83911573	135841639	135891081
RAB40AL	102937272	102938300	-	-	-	-	-	-
LOC109496557	-	-	84421549	84422867	-	-	-	-
Arxes1	-	-	-	-	-	-	136033367	136034946
BEX1	103062651	103064240	84862509	84864093	84029576	84031281	136066565	136068236
NXF3	103075821	103093094	84796296	84807140	83980605	83989335	136072099	136085554
BEX4	103215092	103217200	90832588	90833316	84147133	84148680	136139045	136140439
LOC105259665 (NFX3L)	-	-	84892253	84904218	84065215	84073826	-	-
LOC110257687 (NXF3L)	-	-	-	-	84109452	84117997	-	-
TCEAL8	103252995	103255193	85016533	85018706	84175196	84177431	136168984	136172251
TCEAL5	103273690	103276869	85035907	85038922	84192480	84193013	136200948	136203851
BEX2	103309346	103311046	85051128	85052751	84223041	84224583	136213972	136215513
TCEAL7	103330186	103332326	85090868	85092918	84247651	84249858	136214914	136226100
TCEAL9	103356452	103358469	85179394	85181202	84276985	84279377	136245080	136247139
BEX3	103376323	103378164	85200341	85202179	84300645	84302124	136270253	136271978
RAB40A	103493266	103519489	-	-	-	-	-	-
LOC106508237	-	-	-	-	84409372	84468158	-	-
TCEAL4	103576231	103587736	86090831	86092827	84475232	84477380	-	-	Lost in non-Sciuromorph Rodentia
Kir3dl2	-	-	-	-	-	-	136447841	136544052
Kir3dl1	-	-	-	-	-	-	136517999	136534306
TCEAL3	103607906	103609927	86099669	86101738	84485887	84490011	136590844	136668377
TCEAL1	103628720	103630953	86130695	86132672	84518999	84521020	136707969	136709873
MORF4L2	103675498	103688158	86163817	86175932	84553770	84566304	136732942	136743686
GLRA4	103707344	103728624	86191659	86213069	84584907	84612860	136756628	136783517
TMEM31	103710909	103714032	86381429	86382937	-	-	-	-	Lost in Myomorpha
PLP1	103776506	103792619	86263873	86279960	84676627	84683517	136822166	136838582
RAB9B	103822325	103832282	86312213	86321532	84721269	84733000	136858151	136868540
Pig Ampliconic	-	-	-	-	84779597	84806994	-	-
TMSB15B	103962627	103965990	86389395	86392793	84815565	84871809	136954988	136976874
Tmsb15b2	-	-	-	-	-	-	136954988	136957979
H2BFWT	104011147	104013687	-	-	-	-	-	-
H2BFM	104039753	104042454	86370229	86370496	-	-	136927325	136928373
Tmsb15b1	-	-	-	-	-	-	136974022	136976874
SLC25A53	104099214	104157027	86415252	86425203	84860180	84871866	136981116	137038302
ZCCHC18	104112416	104121330	86425371	86431372	84870668	84875040	136992379	136996923
FAM199X	104157074	104195902	86485648	86520317	84937153	84966438	137049594	137082503
ESX1	104250038	104254918	86575737	86580722	84995241	85007557	137115397	137122131
LOC110257688 (CFAP251-like)	-	-	-	-	85039485	85040165	-	-
IL1RAPL2	104566315	105769729	86893853	88104042	85347867	86464670	137570754	138849077
TEX13A	105218929	105220693	87543581	87545226	85955144	85956458	138208158	138209591
NRK	105821944	105958610	88154040	88299638	86534467	86663340	138914318	139010532
SERPINA7	106032439	106038727	88383590	88387389	86708624	86714324	139079249	139085270
4930513O06Rik	-	-	-	-	-	-	139086243	139093403
4933428M09Rik	-	-	-	-	-	-	139179215	139181009
MUM1L1	106168278	106208961	88446743	88473630	86785317	86814631	139210030	139238335
Human Ampliconic	106266280	106278816	-	-	-	-	-	-
LOC100515519 (NCL-like)	-	-	-	-	86974106	86976917	-	-
LOC101101037 (SUMO2)	-	-	88751919	88913565	-	-	-	-
Trap1a	-	-	-	-	-	-	139333683	139338169
CXorf57	106611930	106679443	88926420	89011948	87025603	87103503	139480226	139554589
RNF128	106693838	106797016	89025353	89134471	87111875	87211605	139563340	139673145
TBC1D8B	106802689	106876150	89140438	89200287	87217327	87291054	139684960	139754221
RIPPLY1	106900063	106903331	89230931	89234218	87315355	87319580	139779681	139782353
CLDN2	106900164	106930861	89250460	89260861	87352695	87355724	139800808	139811386
MORC4	106940300	107000244	89272298	89322744	87369311	87427296	139821635	139871691
RBM41	107061885	107118827	89438438	89500656	87512887	87575118	139889511	139998595
NUP62CL	107123427	107206440	89504995	89585569	87578656	87658296	140006802	140062707
PIH1D3	107206629	107244243	89585716	89621624	87658355	87696318	140062879	140106797
LOC111558744 (WAS-like)	-	-	89806259	89807504	-	-	-	-
FRMPD3	107522450	107605264	89857539	89940454	87980635	88053070	140277679	140435467
PRPS1	107628424	107651026	89953853	89975433	88074861	88101925	140456603	140476140
TSC22D3	107713221	107777329	90043622	90106136	88171325	88233583	140539528	140600522
MID2	107820961	107931637	90125270	90260212	88294032	88394885	140664304	140767715
LOC105373310	107968531	107986048	90286216	90312485	88403475	88466669	-	-
TEX13B	107980864	107982370	90296547	90299443	88431789	88434544	140808307	140813433
VSIG1	108018886	108079184	90397308	90359595	88468498	88534958	140907515	140939472
PSMD10	108084205	108091644	90403557	90411658	88540261	88548593	140948425	140956711
ATG4A	108088900	108154671	90411807	90468672	88545924	88633328	140953893	141164270
COL4A6	108155607	108439497	90470016	90785591	88634925	88750938	141165403	141474076
COL4A5	108439844	108697545	90787035	91027351	88958837	89183306	141475370	141689236
IRS4	108719949	108736584	91049085	91067330	89204348	89221463	141710998	141725217
GUCY2F	109372061	109482056	91471954	91584491	89557952	89653491	142079289	142197276
NXT2	109535781	109544698	91615328	91622138	89684733	89691808	142226770	142239700
KCNE5	109623700	109625164	91679630	91681089	89741187	89742732	142304753	142306198
ACSL4	109641330	109733403	91703989	91763242	89760863	89838103	142317993	142390800
TMEM164	110002413	110184438	92049813	92215398	90105293	90289674	142680347	142843494
LOC101928589	110175773	110177788	-	-	-	-	-	-
AMMECR1	110194186	110440233	92232377	92343755	90304918	90420207	142853474	142966728
RGAG1	110358101	110456334	92463872	92475117	90553099	90565001	143057943	143105330
CHRDL1	110673856	110796058	92620072	92738501	90703422	90827216	143285674	143394265
PAK3	110944241	111227361	92867063	93125748	90941976	91244331	143518371	143797796
CAPN6	111245099	111270546	93138659	93162516	91258696	91288128	143802236	143827412
DCX	111293779	111412232	93193434	93303536	91317671	91644572	143855842	143933275
SERTM2	111511662	111522399	93411641	93423106	91534775	91549167	144153695	144166274
ALG13	111680741	111764164	93538063	93600115	91644586	91708695	144317966	144374450
TRPC5	111774314	112082943	93612052	93885651	91716334	91988364	144377327	144688180
TRPC5OS	111876051	111903990	93637054	93714762	91821128	91823780	144455781	144477063
RTL4	112083025	112457245	94223467	94237038	91920451	92333326	144688218	145122414
LOC100738042 (MIC10-like)	-	-	-	-	92197909	92199862	-	-
LHFPL1	112630651	112680178	94347084	94386935	92422913	92542291	145290359	145372308
AMOT	112774877	112840946	94469272	94533169	92581995	92647872	145446424	145505533
HTR2C	114584078	114910061	95944155	96245607	94053415	94313352	146962513	147197277
LOC111556295	-	-	96268507	96273224	-	-	-	-
IL13RA2	115003975	115017644	96337482	96356250	94402665	94455609	147383478	147429192
LRCH2	115110611	115234082	96439819	96540792	94486560	94589930	147470375	147554102
RBMXL3	115189400	115192868	-	-	-	-	-	-
LOC102900824 (SET-like)	-	-	96487633	96489044	-	-	-	-	Ancestral
GM15128	-	-	-	-	-	-	147789653	147833116
GM15080	-	-	-	-	-	-	147992993	148033174
GM15107	-	-	-	-	-	-	148180675	148224710
GM15127	-	-	-	-	-	-	148663588	148703849
LUZP4	115289717	115307556	96618090	96656326	94631490	94647712	148857694	148924139
LOC105373314	115454266	115465553	-	-	-	-	-	-
PLS3	115560850	115650861	96876741	96970892	94885098	94971664	75785654	75875178
Human Ampliconic	115843208	115886139	-	-	-	-	-	-
Pig Ampliconic	-	-	-	-	95013653	95139430	-	-
AGTR2	116170705	116174972	97156716	97160977	95267709	95272237	21484549	21488833
SLC6A14	116436579	116461458	97368162	97392094	95482494	95507200	21714900	21742358
CT83	116461686	116463033	97394044	97395818	95508720	95510921	-	-	Lost in Myomorpha
KLHL13	117897813	118117340	98493093	98697738	96545099	96950242	23219271	23365108
LOC110257690	-	-	-	-	95554791	95654903	-	-
LOC414400 (RPLP1L)	-	-	-	-	96800950	96875862	-	-
WDR44	118345997	118449961	98916398	98995863	96950288	97027069	23692952	23806026
Gm4907	-	-	-	-	-	-	23882524	23907602
Gm5934	-	-	-	-	-	-	24474308	24499163
Gm4297	-	-	-	-	-	-	24552250	24573305
Gm5935	-	-	-	-	-	-	24753162	24775164
Gm5169	-	-	-	-	-	-	25277487	25301455
Gm1993	-	-	-	-	-	-	25548501	25570449
Gm5168	-	-	-	-	-	-	26028214	26051041
Gm2012	-	-	-	-	-	-	26200882	26231323
Gm2030	-	-	-	-	-	-	26287199	26310044
Slx	-	-	-	-	-	-	26522657	26545565
Gm14525	-	-	-	-	-	-	26672780	26702638
Gm6121	-	-	-	-	-	-	26912743	26935669
Gm10230	-	-	-	-	-	-	27472033	27494939
Gm10058	-	-	-	-	-	-	27924021	27946885
Gm4836	-	-	-	-	-	-	28270710	28293632
Gm10147	-	-	-	-	-	-	28584995	28607874
Gm10096	-	-	-	-	-	-	28931807	28954702
Gm10488	-	-	-	-	-	-	29976314	29999162
Gm14632	-	-	-	-	-	-	30329740	30352646
Gm10487	-	-	-	-	-	-	30820542	30843469
Btbd35f29	-	-	-	-	-	-	31117576	31119415
LOC108168466 (SPIN2A-like)	-	-	-	-	-	-	31254636	31255381
Btbd35f26	-	-	-	-	-	-	31336219	31338442
Btbd35f19	-	-	-	-	-	-	31381876	31384047
Spin2e	-	-	-	-	-	-	31618191	31619833
Btbd35f25	-	-	-	-	-	-	31715299	31717235
Gm21637	-	-	-	-	-	-	31960926	31962821
Btbd35f22	-	-	-	-	-	-	32047582	32049551
Btbd35f2	-	-	-	-	-	-	32278394	32280342
Gm21466	-	-	-	-	-	-	32437174	32438844
Btbd35f1	-	-	-	-	-	-	32560055	32562009
Gm5926	-	-	-	-	-	-	32649778	32651426
Btbd35f21	-	-	-	-	-	-	32726137	32728057
Btbd35f30	-	-	-	-	-	-	32894527	32896366
Btbd35f5	-	-	-	-	-	-	32973897	32975846
Btbd35f12	-	-	-	-	-	-	33313338	33315288
LOC100862179 (SPIN2A-like)	-	-	-	-	-	-	33476982	33478575
Btbd35f15	-	-	-	-	-	-	33575387	33577346
Btbd35f13	-	-	-	-	-	-	33657140	33659082
Btbd35f14	-	-	-	-	-	-	33700649	33702349
Gm46683	-	-	-	-	-	-	33777828	33778538
Btbd35f6	-	-	-	-	-	-	33954615	33956624
Btbd35f9	-	-	-	-	-	-	34159642	34161734
LOC108168468 (SPIN2A-like)	-	-	-	-	-	-	34237100	34238592
Btbd35f8	-	-	-	-	-	-	34450295	34452516
Gm10486	-	-	-	-	-	-	35067384	35090316
Gm14819	-	-	-	-	-	-	35404215	35427094
DOCK11	118495664	118686162	99048419	99249211	97068488	97267528	35888621	36076570
IL13RA1	118726954	118794533	99283619	99340720	97300960	97353754	36112108	36171262
ZCCHC12	118823743	118826973	99368615	99371862	97379908	97384384	36195904	36199158
LONRF3	118974614	119022925	99474860	99514534	97494305	97547813	36328358	36366857
LOC105259672 (CT47A-like)	-	-	99555530	99558490	-	-	-	-
Gm33383 (Ct47b-like)	-	-	-	-	-	-	36401263	36403446
Gm6268 (Ct47-like)	-	-	-		-	-	36403477	36404654
KIAA1210	119078635	119151082	99562160	99620847	97581400	97651765	36422381	36513829
PGRMC1	119236245	119244466	99707521	99716201	97735402	97743424	36598193	36606079
AKAP17B	119244740	119273600	99719480	99749426	97745976	97873665	36608173	36645472
SLC25A43	119399295	119454478	99854181	99887227	97868804	97906771	36743549	36777307
SLC25A5	119468400	119471396	99897778	99900931	97919295	97922245	36795597	36798808
CXorf56	119538149	119565434	99927391	99981979	97974596	97986281	36827551	36864303
UBE2A	119574467	119584429	99991668	100001265	97925136	98007551	36874295	36884222
NKRF	119588337	119606464	100003901	100020177	98008870	98025423	36886440	36903344
SEPT6	119615724	119693370	100027435	100089441	98033212	98106082	36911272	36990050
SOWAHD	119758613	119760202	100169443	100172267	98154437	98158808	37048845	37050418
RPL39	119786504	119791659	100196863	100200617	98178148	98181439	37082518	37085222
UPF3B	119805311	119853028	100216752	100232654	98184646	98206135	37091678	37110400
RNF113A	119870532	119871828	100249246	100250457	98218689	98219931	37191222	37192467
NDUFA1	119871771	119876666	100250550	100254505	98219717	98223873	37187588	37191238
AKAP14	119895973	119920716	100263630	100284103	98234469	98255396	37150698	37168842
NKAP	119925050	119943772	100284052	100311212	98233504	98276839	37126763	37150746
RHOXF2B	120072264	120077742	-	-	-	-	-	-
Gm9 (Rhox family member)	-	-	-	-	-	-	37208502	37211041
Rhox1	-	-	-	-	-	-	37213804	37222258
Rhox2a	-	-	-	-	-	-	37244992	37249690
Rhox3a	-	-	-	-	-	-	37249919	37258978
Rhox4a	-	-	-	-	-	-	37265067	37270136
Rhox3a2	-	-	-	-	-	-	37380383	37384431
Rhox4a2	-	-	-	-	-	-	37390860	37395621
Rhox2b	-	-	-	-	-	-	37411736	37416844
Rhox4b	-	-	-	-	-	-	37432494	37437278
Rhox2c	-	-	-	-	-	-	37453480	37458417
Rhox3c	-	-	-	-	-	-	37469868	37473961
Rhox4c	-	-	-	-	-	-	37480337	37485124
Rhox2d	-	-	-	-	-	-	37493410	37497715
Rhox4d	-	-	-	-	-	-	37514385	37519176
Rhox2e	-	-	-	-	-	-	37530322	37541851
Rhox3e	-	-	-	-	-	-	37546975	37550897
Rhox4e	-	-	-	-	-	-	37557412	37562283
Rhox2f	-	-	-	-	-	-	37571421	37576159
Rhox3f	-	-	-	-	-	-	37581352	37585496
Rhox4f	-	-	-	-	-	-	37602895	37607686
Rhox3g	-	-	-	-	-	-	37623431	37628139
Rhox2g	-	-	-	-	-	-	37639112	37643470
Rhox4g	-	-	-	-	-	-	37646501	37651327
Rhox3h	-	-	-	-	-	-	37657688	37668764
Rhox2h	-	-	-	-	-	-	37668997	37673277
Rhox5	-	-	-	-	-	-	37754608	37808878
Rhox6	-	-	-	-	-	-	37827055	37829857
Rhox7a	-	-	-	-	-	-	37831686	37841171
Rhox8	-	-	-	-	-	-	37874776	37890766
Rhox9	-	-	-	-	-	-	37899097	37901770
Rhox10	-	-	-	-	-	-	38066475	38071688
Rhox11	-	-	-	-	-	-	38076598	38085139
Rhox12	-	-	-	-	-	-	38104062	38110907
RHOXF1	120109049	120117651	100340110	100343070	98304777	98310448	38120840	38129966	Rhox13
RHOXF2	120158534	120164039	-	-	-	-	-	-
LOC111558775 (Rhox2b-like)	-	-	100403905	100412811	-	-	-	-
LOC101093839 (RHOXF1)	-	-	100457942	100491105	-	-	-	-
LOC102902213 (ESX1-like)	-	-	100484691	100498155	98336502	98366377	-	-	Ancestral placental mammal gene lost in primates, non-sciurid rodents, but retained in Afrotheria and Xenarthra
ZBTB33	120250752	120258396	100616899	100624585	98370137	98413686	38189793	38197046
TMEM255A	120250984	120311556	100625439	100681885	98412286	98464683	38196573	38252490
ATP1B4	120362085	120383249	100730790	100752677	98514286	98535154	38316122	38336784
LOC109496592 (TEX13C)	-	-	100773479	100776806	98565476	98570266	-	-
LAMP2	120426148	120469349	100789570	100826161	98586718	98623939	38401357	38456463
CUL4B	120524589	120575829	100886099	100942715	98668945	98730582	38531616	38576196
MCTS1	120603889	120621159	100966273	100980130	98729858	98742967	38600444	38613524
C1GALT1C1	120625674	120630150	100990574	100995165	98752711	98758428	38630783	38635143
6030498E09Rik	-	-	-	-	-	-	38772780	38962688
Cypt15	-	-	-	-	-	-	39346266	39346963
Cypt14	-	-	-	-	-	-	39862919	39863604
CT47B1	120872554	120875925	-	-	-	-	-	-
CT47A12	120877490	120932399	-	-	-	-	-	-
CT47A11	120933840	120937260	-	-	-	-	-	-
CT47A10	120938701	120942121	-	-	-	-	-	-
CT47A9	120943561	120946981	-	-	-	-	-	-
CT47A8	120948422	120951842	-	-	-	-	-	-
CT47A7	120953282	120956600	-	-	-	-	-	-
CT47A6	120958165	120961588	-	-	-	-	-	-
CT47A5	120963026	120966446	-	-	-	-	-	-
CT47A4	120967886	120971306	-	-	-	-	-	-
CT47A3	120972746	120976166	-	-	-	-	-	-
CT47A2	120977606	120981026	-	-	-	-	-	-
CT47A1	120982466	120985886	-	-	98978636	98984740	-	-
GLUD2	121047608	121049942	-	-	-	-	-	-
GRIA3	123184243	123490915	102983402	103248808	100827293	101109213	41401118	41678601
THOC2	123600561	123733054	103335431	103449008	101170969	101284623	41794992	41911919
XIAP	123859812	123913979	103548360	103595249	101399374	101440021	42059615	42109664
STAG2	123960560	124102656	103639232	103778622	101476117	101617405	42149319	42277186
TEX13D	124332660	124336862	103867239	103962815	101806861	101810876	42489361	42491953
SH2D1A	124346282	124373160	103973050	103994799	101824602	101847265	42502565	42522097
TENM1	124374680	125204305	103998806	104786495	101853340	102641299	42527866	43429155
TEX13C	125319871	125325214	104917037	104921310	-	-	43590989	43593530
LOC111558717 (SLC25A5-like)	-	-	105286333	105289452	-	-	-	-
DCAF12L2	126163499	126166097	105616574	105619780	103322468	103327458	44365457	44368337
DCAF12L1	126549383	126552859	105953462	105955234	103369987	103641354	44786567	44790197
PRR32	126819764	126821786	106185709	106187729	103813092	103815208	45090904	45092791
ACTRT1	128050962	128052403	107556693	107557796	104936448	104941473	46329007	46330345
SMARCA1	129446501	129523564	108814912	108887407	106039961	106116156	47809370	47892575
OCRL	129532737	129592561	108904064	108954710	106124991	106188066	47912401	47966428
APLN	129645259	129654956	109002162	109011490	106236746	106246563	48025146	48034852
XPNPEP2	129738970	129769549	109088257	109114907	106333785	106363412	48106913	48136982
SASH3	129779916	129795201	109123662	109137279	106373871	106389454	48146436	48161565
ZDHHC9	129803288	129843934	109146528	109178429	106397139	106436103	48171967	48208702
CCDC169	-	-	-	-	106457036	106457680	-	-	Laurasiatheria-specific.
UTP14A	129906121	129929762	109221045	109240421	106479028	106500389	48256934	48282450
BCORL1	129980285	130058083	109278110	109342003	106547754	106613130	48341358	48408068
ELF4	130064920	130110713	109346439	109396516	106617747	106661340	48411049	48463132
RAB33A	130110633	130184872	109442589	109453387	106708402	106723803	48519285	48530240
AIFM1	130129362	130165887	109404549	109437644	106676596	106708290	48474944	48513563
ZNF280C	130202699	130268948	109445347	109530503	106735129	106795789	48541626	48594648
SLC25A14	130339888	130373361	109571839	109601034	106828695	106859128	48623418	48662298
GPR119	130384345	130385537	109613720	109620518	106872225	106873299	48667979	48674478
RBMX2	130401969	130413343	109633066	109644156	106880912	106890391	48695004	48710719
LOC101091264 (FSIP2L)	-	-	109654155	109733819	106902342	106978056	-	-	Lost in Haplorhini, Caviomorpha, and Myomorpha
ENOX2	130622330	130903317	109841761	110109116	107084378	107368520	49009707	49288244
ARHGAP36	131058242	131089885	110234687	110287410	107368552	107537747	49448359	49500250
Olfr1320	-	-	-	-	-	-	49683504	49684463
Olfr1321	-	-	-	-	-	-	49726973	49727932
IGSF1	131273506	131289457	110411113	110427472	107674966	108050736	49782536	49797907
LOC101091768 (OR10A4L)	-	-	110482373	110483278	107736747	107737673	49885469	49886401
LOC100511059 (OR1020L)	-	-	-	-	107752365	107762735	-	-
LOC101092250 (OR1052L)	-	-	110561488	110562411	107820069	107821040	50009306	50010235
LOC101092501 (OR1468L)	-	-	110583737	110584802	107894520	107895892	50425496	50426494
OR13H1	131544074	131545000	110626418	110627344	107908613	107912960	-	-	Lost in Myomorpha
LOC101093004 (OR13H1L)	-	-	110690989	110700409	107949245	107956580	-	-	Lost in Myomorpha
STK26	132023217	132075943	110949831	111004429	108179230	108237669	50841174	50893103
FRMD7	132076986	132128022	111005979	111058020	108241116	108294188	50892645	50943619
RAP2C	132203024	132219480	111105210	111121394	108332623	108348432	51003912	51020092
MBNL3	132369314	132490030	111228137	111340623	108488224	108612896	51113494	51206035
HS6ST2	132626010	132961395	111479410	111771154	108755577	109043976	51386637	51681705
USP26	133024631	133083768	111825286	111878581	109092622	109095548	51752667	51801233
TFDP3	133216669	133218348	-	-	-	-	-	-
1700080O16Rik (Magea10L)	-	-	-	-	-	-	51968693	51972864
GPC4	133301036	133415177	112051216	112160598	109306489	109421947	52050885	52164923
GPC3	133535745	133985646	112250013	112672268	109536495	109973605	52272426	52613974
LOC109496610 (COXB1-like)	-	-	112785295	112785825	-	-	-	-
CCDC160	134237047	134246207	112848269	112857122	110159833	110170354	52791200	52799474
PHF6	134373312	134428792	112940592	112987150	110249010	110311503	52912214	52956961
HPRT1	134460145	134500668	113011256	113046496	110321144	110357902	52988078	53021660
PLAC1	134565838	134764322	113095057	113095909	110403257	110592117	53069993	53240122
FAM122B	134769566	134797232	113095853	113299385	110570091	110617779	53243415	53269852
FCAB-89F20_Transcript1	-	-	113260518	113371029	-	-	-	-
FAM122C	134796413	134855137	113304741	113406237	110619227	110682249	53273419	53331186
MOSPD1	134887626	134915344	113381214	113404527	110693538	110786323	53344594	53370562
SMIM10	134990938	134992473	113471475	113472486	110754797	110761398	-	-	Lost in Myomorpha (and a few other rodents)
FAM127C	135020504	135022536	-	-	110793198	110794496	53607922	53609135
FAM127A	135032303	135033546	-	-	110810150	110811475	53642488	53643763
LOC110257712 (FAM127L)	-	-	-	-	110813912	110815239	-	-
FAM127B	135050932	135052191	-	-	110833247	110834588	53669177	53670408
SMIM10L2B	135094985	135098634	-	-	-	-	-	-
CT55	135156536	135171827	113634556	113659010	110848227	110890277	53724831	53738565
ZNF75D	135248589	135344109	113702428	113716109	110890310	110904067	-	-	Lost in Myomorpha
LOC101928677 (ETDAL)	135252012	135255796	-	-	-	-	-	-
EDTA	135252061	135253582	-	-	-	-	53434918	53443576
1700013H16Rik (Sycp3l)	-	-	-	-	-	-	53742901	53757970
Zfp36l3	-	-	-	-	-	-	53772686	53776394
Xlr	-	-	-	-	-	-	53777118	53797716
Gm16405 (duplicate of Slxl1)	-	-	-	-	-	-	54531166	54548016
Gm16430 (duplicate of Slxl1)	-	-	-	-	-	-	54622169	54639019
Slxl1	-	-	-	-	-	-	55226876	55243736
3830403N18Rik (Xlrl)	-	-	-	-	-	-	55839252	56153496
ZNF449	135344098	135363413	113768398	113985242	110928168	110948607	56346381	56365674
SMIM10L2A	135421933	135428074	113635548	113636189	110959731	110963079	56374586	56378470
INTS6L	135520630	135582535	113908236	113964274	111011860	111072939	56454825	56507843
CT45A1	135708398	135723318	-	-	-	-	-	-
CT45A3	135760067	135768222	-	-	-	-	-	-
CT45A5	135777130	135785512	-	-	-	-	-	-
CT45A6	135794687	135802755	-	-	-	-	-	-
CT45A2	135811979	135820062	-	-	-	-	-	-
CT45A7	135829229	135837317	-	-	-	-	-	-
CT45A8	135846497	135854588	-	-	-	-	-	-
CT45A9	135863418	135871812	-	-	-	-	-	-
CT45A10	135880752	135893577	-	-	-	-	-	-
SAGE1	135893607	135913061	-	-	-	-	-	-	Ancestral
LOC102901637 (INTS6LB)	-	-	113989641	113995777	-	-	-	-
LOC102900259 (INTS6LC)	-	-	114029238	114037881	-	-	-	-
LOC102901675 (INTS6LD)	-	-	114066472	114075813	-	-	-	-
LOC100157667 (INTS6L)	-	-	-	-	111094016	111110838	-	-
MMGT1	135962072	135973975	114104211	114115308	111145712	111158298	56585512	56597919
SLC9A6	135974597	136047269	114115623	114179064	111176461	111233108	56609556	56664230
FHL1	136146702	136211359	114256132	114317988	111309989	111367900	56731720	56793346
MAP7D3	136213220	136256482	114321415	114355288	111371538	111420230	56794833	56822490
LOC100621767 (ADGRG4L)	-	-	-	-	111469540	111488383	-	-
LOC101083152	-	-	114371227	114374873	-	-	-	-
ADGRG4	136300963	136416888	114420132	114430715	111490544	111534000	56894234	56980270
BRS3	136487966	136492439	114543958	114549324	111615695	111620124	57043074	57048758
HTATSF1	136496932	136512346	114553044	114567685	111624303	111643566	57053570	57067183
VGLL1	136532152	136556807	114583892	114605394	111662565	111684676	57088106	57106540
CD40LG	136648177	136660390	114691149	114701862	111778666	111788901	57212143	57224042
ARHGEF6	136665547	136781656	114713149	114813252	111796485	111917195	57231485	57338758
RBMX	136869194	136880780	114841842	114850834	111965859	111974544	57383348	57393045
LOC101083916 (TM9SF2-like)	-	-	114876436	114966994	-	-	57400767	57488773
Pig Ampliconic	-	-	-	-	111987560	112007873	-	-
GPR101	137030148	137031674	114969792	114977059	112109592	112111333	57496668	57503757
ZIC3	137566187	137577691	115410242	115422007	112592951	112605087	58021464	58041735
LOC102158723	-	-	-	-	112845408	112848002	-	-
LOC110257694 (PRB2-like)	-	-	-	-	113340076	113341321	-	-
LOC101085187 (MAGEA13P)	-	-	116050665	116055042	113340314	113343205	58911461	58920304
FGF13	138631573	139222889	116145094	116590052	113460191	113955691	59062139	59585572
LOC100523110 (RPS27L)	-	-	-	-	114070842	114071361	-	-
F9	139530720	139563459	116887263	116918774	114218704	114250436	59999464	60030760
MCF2	139581768	139708279	116934764	117042273	114258082	114356106	60055956	60179184
ATP11C	139726346	139933083	117075538	117247300	114394436	114575658	60223283	60404861
LOC110257749 (SEC31L)	-	-	-	-	114575980	115026005	-	-
CXorf66	139955725	139965518	117270738	117273868	114596809	114602521	60436052	60456195
LOC389895 (C16orf72)	140091667	140092911	117394312	117395573	114686410	114687790	60548008	60549217
LOC102899102 (TNP4L)	-	-	117523369	117524122	-	-	-	-
SOX3	140502987	140505060	117701218	117703446	115017704	115020601	60891366	60893430
CDR1	140783260	140784558	117949270	117972537	115221975	115223194	61183246	61185558
LOC101086956 (MAGE10L)	-	-	118027981	118035411	115168447	115304951	61288157	61292488
SPANXB1	141002591	141003706	-	-	-	-	-	-
LDOC1	141175745	141177214	118371608	118373938	115580622	115583129	61709616	61710950
SPANXC	141241463	141242550	-	-	-	-	-	-
SPANXA1	141583674	141584738	-	-	-	-	-	-
SPANXA2	141589708	141590772	-	-	-	-	-	-
LOC645188	141625864	141626733	-	-	-	-	-	-
SPANXD	141697401	141698739	-	-	-	-	-	-
MAGEC3	141838316	141897832	-	-	-	-	-	-
MAGEC1	141903856	141909401	-	-	-	-	-	-
MAGEC2	142202342	142205290	-	-	-	-	-	-
SPANXN4	143025918	143038637	-	-	-	-	-	-
SPANXN3	143508735	143517475	-	-	-	-	-	-
LOC110257823	-	-	-	-	115725317	115728246	-	-
4933402E13Rik	-	-	-	-	-	-	62282960	62292084
3830417A13Rik	-	-	-	-	-	-	64173548	64178778
SLITRK4	143622790	143636107	120030266	120041896	117145647	117157275	64264883	64277394
SPANXN2	143712035	143720668	-	-	-	-	-	-
SPANXN1	145247587	145256208	-	-	-	-	-	-
LOC102157658 (MAGEA13P)	-	-	-	-	118448490	118566819	-	-
SLITRK2	145817829	145829856	121752825	121761064	118826531	118837134	66649318	66661402
CXorf51B	146809784	146810411	-	-	-	-	-	-
CXorf51A	146814104	146814731	-	-	-	-	-	-
LOC105373347 (PPHLN1)	147181049	147271945	-	-	-	-	-	-
LOC101091265 (ELL2)	-	-	122289789	122297994	-	-	-	-
LOC102901550 (TNP4)	-	-	122457512	122458309	118621838	118622598	-	-
Gm1140	-	-	-	-	-	-	67682900	67693562
Gm14692	-	-	-	-	-	-	67695698	67706258
4933436I01Rik	-	-	-	-	-	-	67919864	67921450
FMR1	147911951	147951127	123391591	123437956	120361232	120400282	68678541	68717963
FMR1NB	147981329	148026667	123451427	123485997	120421266	120458866	68761839	68804561
Gm6812	-	-	-	-	-	-	68892373	68893053
AFF2	148500619	149000663	123854495	124315183	120777559	121263574	69360331	69872054
LOC110257797	-	-	-	-	121231431	121500019	-	-
1700020N15Rik	-	-	-	-	-	-	69945281	69945980
IDS	149476990	149505354	124628824	124669036	121572797	121596525	70343069	70385816
CXorf40A	149540630	149555338	124670943	124675729	121620738	121628536	70385913	70389416
HSFX3	149548210	149549852	-	-	-	-	-	-
MAGEA9B	149581653	149587468	-	-	-	-	-	-
LOC110257715 (MAGEA10L)	-	-	-	-	121632759	121634665	-	-
HSFX2	149592512	149595310	124955739	124957491	121645509	121647655	-	-	Lost in Rodentia
TMEM185A	149596556	149631912	124917705	124952628	121648807	121682484	70459753	70477190
MAGEA11	149688202	149717268	-	-	-	-	-	-
HSFX1	149774068	149776859	-	-	-	-	-	-
MAGEA9	149781921	149787737	-	-	-	-	-	-
MAGEA8	149881141	149885835	-	-	-	-	154985775	154995850
LOC100156285 (MAGEA10L)	-	-	-	-	121688350	121691552	-	-
LOC100514940 (MAGEA10L)	-	-	-	-	121699620	121702252	-	-
LOC100513838 (MAGEA10L)	-	-	-	-	121708847	121709729	-	-
LOC100513259 (MAGE8L)	-	-	-	-	121755015	121756449	-	-
LOC106504240 (MAGE10L)	-	-	-	-	121763484	121765954	-	-
CXorf40B	149924152	149938850	124671037	124675611	121769595	121777428	-	-
HSFX4	149929624	149931287	124994523	124996526	121769734	121771155	-	-	Lost in Myomorpha
LOC106506163	-	-	-	-	121776859	121800481	-	-
MAMLD1	150361422	150514178	125400048	125520601	122120275	122233692	71050040	71156056
MTM1	150562658	150673143	125568395	125666396	122286904	122379302	71210767	71315413
MTMR1	150692997	150765103	125682852	125746942	122394768	122455266	71364760	71419196
CD99L2	150766336	150898816	125750073	125846301	122456668	122535989	71420060	71492869
HMGB3	150980508	150990775	125902975	125912360	122591413	122599496	71555917	71560673
GPR50	151176584	151182855	126013800	126019052	122708551	122713163	71663667	71669257
VMA21	151396555	151409364	126184094	126194435	122872141	122882976	71812753	71824706
PASD1	151563535	151676739	126285770	126403290	-	-	-	-	Lost in Rodentia
PRRG3	151694606	151701591	126422961	126436042	123085511	123095589	71962157	71972722
FATE1	151716036	151723194	126430505	126455225	123106086	123113178	71972986	71989046
CNGA2	151734746	151745564	126469435	126477198	123115980	123130043	71991849	72010218
MAGEA4	151912889	151925170	-	-	-	-	72221015	72222964
LOC111558691 (MAGE10L)	-	-	126824121	126854014	-	-	-	-
LOC105260348 (MAGE9L)	-	-	126683205	126684538	-	-	-	-
GABRE	151953124	151974679	126727421	126745089	123278459	123296070	72256926	72274822
MAGEA10-MAGEA5	152114049	152138578	-	-	-	-	-	-
MAGEA5	152114049	152117939	-	-	-	-	155053061	155063151	orthology unclear
MAGEA10	152133310	152138578	-	-	123400803	123401915	72381870	72386858
LOC111558784 (MAGE8L)	-	-	126654649	126681609	-	-	-	-
LOC111558732 (MAGE9L)	-	-	126683304	126684540	-	-	-	-
GABRA3	152166234	152451359	126957525	127327764	123456952	123684814	72432676	72656890
GABRQ	152637895	152659827	127516716	127537734	123834884	123855187	72825163	72842607
MAGEA3	152698742	152702347	-	-	-	-	154948180	154959031	orthology unclear
CSAG2	152708261	152713861	-	-	-	-	-	-
MAGEA2B	152714529	152718607	-	-	-	-	-	-
CSAG1	152727484	152733736	-	-	-	-	-	-
MAGEA12	152733779	152737669	-	-	-	-	-	-
MAGEA2	152749863	152753942	-	-	-	-	155027201	155033313	orthology unclear
CSAG3	152753921	152760222	-	-	-	-	-	-
MAGEA6	152766136	152769729	-	-	-	-	154923895	154936074	orthology unclear
LOC110257698 (MAGE8L)	-	-	-	-	123869573	123870559	-	-
CETN2	152827327	152830757	127595435	127599847	123902240	123906046	72913565	72918344
NSDHL	152830967	152869363	127600003	127629718	123906130	123921935	72918521	72958528
ZNF185	152898132	152973481	127629832	127725471	123942981	123988102	72987247	73031543
PNMA5	152988824	152994458	-	-	123998935	124001201	73033981	73040260
Cat Ampliconic	-	-	127777320	128054510	-	-	-	-
PNMA3	153056343	153060467	X_random	X_random	-	-	73064787	73068191
PNMA6A	153072414	153075019	X_random	X_random	124005969	124007679	-	-	Lost in Myomorpha & Caviomorpha
MAGEA1	153179284	153183878	-	-	-	-	155088519	155089790	orthology unclear
LOC111558739 (SYCP3L)	-	-	127908591	127916129	124048096	124060530	-	-
LOC100154655 (SYCP3L)	-	-	-	-	124078500	124089002	-	-
Xlr4a	-	-	-	-	-	-	73074343	73082526
Xlr3a	-	-	-	-	-	-	73086293	73097095
Xlr5a	-	-	-	-	-	-	73107621	73119113
LOC111558692 (MUM1L1L)	-	-	127953098	127953805	124109383	124111245	73117048	73129269
LOC111558735 (MUM1L1L)	-	-	127954795	127956758	-	-	-	-
PNMA6F	153317681	153321822	128022063	128028114	124144682	124147565	-	-	Gm 18336 and Gm 45015 may be orthologs
DXBay18	-	-	-	-	-	-	73137223	73149450
Xlr5b	-	-	-	-	-	-	73147383	73158886
Spin2d	-	-	-	-	-	-	73175302	73176989
Xlr3b	-	-	-	-	-	-	73192150	73202930
Xlr4b	-	-	-	-	-	-	73214321	73222453
F8a	-	-	-	-	-	-	73228306	73230795
Xlr4c	-	-	-	-	-	-	73234076	73243130
Xlr3c	-	-	-	-	-	-	73254538	73265576
Xlr5c	-	-	-	-	-	-	73283361	73293970
ZNF275	153334155	153352926	128045074	128062116	124156708	124173566	73342621	73359080
LOC110257703 (PNMA6FL)	-	-	-	-	124203040	124204023	-	-
ZFP92	153411461	153426481	128126082	128131849	124215906	124227853	73410978	73428382
TREX2	153444720	153446487	128149973	128153467	124234736	124244193	73433705	73435343
HAUS7	153447665	153495525	128153506	128179291	124234735	124258133	73437315	73459029
ECM2	153483920	153487088	128188262	128191384	124266197	124274910	-	-
BGN	153494889	153509554	128203366	128218021	124282048	124295450	73483601	73495936
ATP2B3	153517677	153582929	128224855	128287266	124318874	124357653	73503023	73573275
CCNQ	153587925	153599177	128291307	128302821	124361003	124370072	-	-	Mouse Chr. 10
DUSP9	153642443	153651326	128352828	128355681	124404852	124414246	73639389	73643514
PNCK	153669723	153687568	128372143	128380465	124425867	124430000	73655992	73660111
SLC6A8	153688297	153696593	128384565	128393419	124435282	124452182	73673133	73682502
BCAP31	153700492	153724746	128397344	128425957	124456999	124484923	73686178	73717815
ABCD1	153724851	153744762	128426339	128446605	124485076	124501742	73716597	73738534
PLXNB3	153764196	153779346	128457676	128474143	124507953	124522780	73756559	73772510
SRPK3	153781001	153785732	128475655	128480296	124524102	124528607	73773994	73778925
IDH3G	153785766	153794523	128480313	128491163	124528643	124537570	73778963	73787008
SSR4	153794175	153798512	128491384	128495497	124537545	124541635	73787028	73790828
PDZD4	153802166	153830567	128498745	128530596	124543845	124567477	73793357	73825033
L1CAM	153861514	153886174	128580459	128595186	124595649	124618292	73853780	73880838
AVPR2	153902531	153907166	128619493	128624661	124638433	124640969	73891798	73894428
ARHGAP4	153907376	153926260	128624891	128640990	124641222	124655312	73894352	73911346
NAA10	153929827	153935154	128646040	128650789	124658429	124662744	73916870	73921944
RENBP	153935263	153944780	128651061	128658135	124662957	124670522	73922121	73930850
HCFC1	153947556	153971833	128660025	128684761	124673125	124694846	73942792	73967135
TMEM187	153972540	153983195	128685410	128690302	124695050	124699349	-	-	Lost in Rodentia
IRAK1	154010506	154019906	128715250	128724215	124717604	124724855	74013914	74023921
MECP2	154021800	154097731	128726484	128794768	124735523	124789063	74026592	74085690
OPN1LW	154144224	154159032	128832464	128844971	124816014	124828225	-	-
OPN1MW	154182596	154196861	-	-	-	-	74127466	74150756
OPN1MW2	154219734	154233286	-	-	-	-	-	-
OPN1MW3	154257620	154271068	-	-	-	-	-	-
TEX28	154271265	154295356	128845087	128861293	124828222	124840093	74150909	74167838
TKTL1	154295674	154330363	128866444	128891925	124840072	124867313	74177259	74208498
LOC110257704 (COL3A1)	-	-	-	-	124870296	124881007	-	-
FLNA	154348529	154374638	128907049	128933039	124889934	124915000	74223461	74249852
EMD	154379237	154381523	128937452	128940278	124883047	124885429	74254672	74261563
RPL10	154398065	154402339	128957135	128959787	124927249	124929791	74270816	74273135
DNASE1L1	154401236	154412101	128960666	128966561	124931410	124937569	74273217	74282333
TAZ	154411406	154421726	128968643	128980289	124940036	124946275	74281900	74295319
ATP6AP1	154428632	154436517	128989243	128997172	124952532	124960344	74294907	74304721
GDI1	154436913	154443467	128997785	129003816	124960835	124966833	74305012	74311867
FAM50A	154444126	154450654	129004582	129011478	124967821	124973487	74313033	74320149
PLXNA3	154458281	154473646	129023303	129230860	124982307	124997098	74329050	74344689
LAGE3	154477769	154479257	129042631	129043956	125001673	125003206	74352162	74353618
UBL4A	154483717	154486670	129048993	129051620	125007121	125009657	74365718	74368548
Gm44504	-	-	-	-	-	-	74367447	74373349
SLC10A3	154487306	154490690	129052273	129056012	125010128	125013992	74369217	74373349
FAM3A	154506159	154516249	129059923	129072130	125015985	125025119	74384719	74393274
G6PD	154531390	154547586	129072590	129086277	125029147	125041040	74409486	74429161
IKBKG	154542240	154565046	129081288	129106679	125035575	125056445	74393291	74456792
CTAG1A	154585154	154586816	-	-	-	-	-	-
CTAG1B	154617609	154619271	-	-	-	-	-	-
CTAG2	154651972	154653579	-	-	-	-	65047644	65049017
LOC105259690 (SLC6A8-like)	-	-	129142593	129299960	-	-	-	-
LOC100737597 (IF-2-like)	-	-	-	-	125072091	125097974	-	-
LOC102158155 (CXorf49L)	-	-	-	-	125109070	125112343	-	-
LOC110257705 (OR10VL)	-	-	-	-	125122994	125125168	-	-
LOC102166335 (LAGE3-like)	-	-	-	-	125150593	125152014	-	-
Gm6880 (Ctag2 duplicate)	-	-	-	-	-	-	74480117	74481544	Ancestral OR gene, also on X in marsupials, lost in many eutherian lineages but present in all superorders.
Olfr1325	-	-	-	-	-	-	74594328	74595275
Gm5640	-	-	-	-	-	-	74639114	74646110
Gm6890 (CTAG2 like 2)	-	-	-	-	-	-	74740927	74742188
Gm5936	-	-	-	-	-	-	74836722	74843369
FCAB-331E2-_Transcript	-	-	128973412	128976005	-	-	-	-
FCAB-331E3_Transcript2	-	-	128981795	128986452	-	-	-	-
FCAB-331E3_Transcript3	-	-	129004897	129011236	-	-	-	-
FCAB-331E2_Transcript4	-	-	129011378	129012810	-	-	-	-
FCAB-331E3_Transcript5	-	-	129021032	129022179	-	-	-	-
GAB3	154675249	154751583	129302568	129380288	125158148	125209080	74988545	75084905
DKC1	154762742	154777689	129392536	129404187	125218928	125228881	75095854	75109777
MPP1	154778684	154805527	129405151	129432086	125230412	125252384	75109733	75131016
SMIM9	154823348	154834662	129439393	129447948	125254737	125262113	75146057	75163756
F8	154835788	155022723	129452667	129583710	125265330	125350853	75170344	75383525
H2AFB1	154885042	154885558	129466208	129466745	125277575	125280752	117014757	117015104	orthology unclear
F8A1	154886360	154888061	129467281	129468536	125280978	125282771	-	-
FUNDC2	155026789	155056916	129583834	129603542	125354032	125366029	75382399	75397158
CMC4	155061622	155071272	129608577	129617918	125372941	125383272	75404846	75416584
MTCP1	155064034	155071272	129612554	129617917	125372941	125377910	75410442	75416584
BRCC3	155071403	155126766	129618492	129681611	125383392	125439082	75416623	75455702
LOC102900281 (PICALM-like)	-	-	129693615	129742686	125452118	125481762	-	-
VBP1	155197007	155239841	129746430	129767506	125485357	125506781	75514297	75534946
RAB39B	155258234	155264589	129780577	129786497	125520764	125528253	75572045	75578231
CLIC2	155276207	155334681	129827924	129856854	125546451	125560059	-	-
H2AFB2	155380706	155381299	129867247	129867891	125560361	125568560	116681178	116681525	orthology unclear
F8A2	155382115	155383230	129875391	129876664	-	-	-	-
H2AFB3	155459419	155459935	129877212	129878461			120312582	120313226	orthology unclear
LOC106507061 (EVA1C-like)	-	-	-	-	125579523	125595031	-	-
TMLHE	155489007	155612961	129887951	129962794	125601920	125673716	X_random	X_random
SPRY3	155612565	155782459	130124389	130136158	125744643	125764342	X_random	X_random
VAMP7	155881280	155943769	130229543	130286957	125863266	125917232	X_random	X_random
IL9R	155997581	156013017	-	-	-	-	-	-
GTPBP6AL	-	-	130326918	130332874	-	-	-	-	Cat-specific duplicate from PAR1
PLCXD1L	-	-	130337072	130366478	-	-	-	-	Cat-specific duplicate from PAR1

## Sheet: SupplementalTableS5
Supplemental Table S5. Coordinates for blocks of conserved linkage shared between the colinear X chromosomes of the human, cat, and pig and the rearranged X chromosome of the mouse. Ampliconic regions falling within 1 Mb of synteny breakpoints are provided for each species.
Gene Name	Human Start	Human End	Cat Start	Cat End	Pig Start	Pig End	Mouse Start	Mouse End	Human Ampliconic Start	Human Ampliconic End	Cat Ampliconic Start	Cat Ampliconic End	Pig Ampliconic Start	Pig Ampliconic End	Mouse Ampliconic Start	Mouse Ampliconic End
ASMT	1595455	1643081	1182975	1225823	Unplaced	Unplaced	170672644	170678054	NA	NA	NA	NA	NA	NA	170737096	170881298
PRKX	3604343	3713634	2162556	2238207	657421	753739	77760972	77796222	3821643	3938401	NA	NA	NA	NA	NA	NA
OBP	-	-	2972471	3088371	2012066	2019074	77837898	77853500	3821643	3938401	NA	NA	NA	NA	NA	NA
TBL1X	9463295	9719740	6801831	7040922	5994324	6238843	77510547	77662713	NA	NA	NA	NA	NA	NA	NA	NA
GPR143	9725413	9765965	7027703	7095421	6242296	6276654	152781921	152808651	NA	NA	NA	NA	NA	NA	152409657	152438240
CLDN34	9961042	9968381	7293475	7296076	6454319	6460306	152537528	152564198	NA	NA	NA	NA	NA	NA	152409657	152438240
MID1	10445310	11111264	7719203	8316004	7235386	7906049	169685199	169990798	NA	NA	NA	NA	NA	NA	170737096	170881298
SAT1	23783158	23786223	20204990	20208126	19908037	19910553	155213126	155216449	NA	NA	NA	NA	NA	NA	NA	NA
APOO	23833348	23907940	20247999	20304786	19953147	20017784	94367011	94417093	NA	NA	NA	NA	NA	NA	94706195	94816711
PRRG1	37349275	37457295	32713195	33023125	33064499	33232556	78449610	78583912	NA	NA	32508395	32553921	NA	NA	NA	NA
LANCL3	37571569	37684463	33204241	33300007	33426731	33543506	9199973	9268085	NA	NA	33331550	33731671	NA	NA	8480304	8499226
SPACA5	48004336	48009736	42409591	42414886	42476719	42478783	21068488	21077959	48366973	48428451	NA	NA	NA	NA	NA	NA
SSX5	48177982	48196798	42520453	42529113	-	-	8803691	8811422	48366973	48428451	NA	NA	NA	NA	8480304	8499226
NUDT11	51490011	51496607	44938000	44944519	44912160	44918977	6047507	6054751	51668020	52920401	44755455	45138749	45054183	45858289	NA	NA
GSPT2	51743385	51746232	45253096	45255645	45193336	45195939	94636069	94638562	51668020	52920401	44755455	45138749	45054183	45858289	94706195	94816711
MAGED1	51802998	51902354	45393059	45399825	45258761	45329282	94535474	94542074	51668020	52920401	44755455	45138749	45054183	45858289	94706195	94816711
GPR173	53049324	53080615	45560596	45584348	45883738	45908197	152343598	152368966	51668020	52920401	44755455	45138749	45054183	45858289	152409657	152438240
ALAS2	55009055	55031064	47649435	47676059	47871519	47896041	150547417	150570622	55453508	55480140	47827412	48044461	47435127	47474791	147824892	150099691
MAGEH1	55452089	55453568	48015477	48016899	48080533	48081983	153036166	153037563	55453508	55480140	47827412	48044461	48022185	48041616	154000736	154066465
SPIN2B	57112142	57121905	49501971	49515986	49492205	49507749	153832001	153834243	NA	NA	48873431	50205533	49181699	49206013	154000736	154066465
ZXDB	57591836	57597477	49633997	49639386	49787449	49790835	94724569	94730191	NA	NA	48873431	50205533	49181699	49206013	94706195	94816711
LUZP4	115289717	115307556	96618090	96656326	94631490	94647712	148857694	148924139	115843208	115886139	NA	NA	95013653	95139430	147824892	150099691
PLS3	115560850	115650861	96876741	96970892	94885098	94971664	75785654	75875178	115843208	115886139	NA	NA	95013653	95139430	74642652	74840177
DXZ4	115560000	116176000	97160000	97330330	94980000	95260000	75,386,385	75875972	115843208	115886139	NA	NA	95013653	95139430	74642652	74840177
AGTR2	116170705	116174972	97156716	97160977	95267709	95272237	21484549	21488833	115843208	115886139	NA	NA	95013653	95139430	NA	NA
RAB39B	155258234	155264589	129780577	129786497	125520764	125528253	75572045	75578231	154149491	155504549	128894640	129296379	NA	NA	74642652	74840177

## Sheet: SupplementalTableS6
Supplemental Table S6. Locations of novel genes on the human X chromosome. Genes within ampliconic regions are italicized, underlined, and in bold.
Gene Name	Human Start	Human End	Status	Origin
LOC105373102	1392349	1396881	N.A.	Independently acquired.
VCX3A	6533618	6535118	N.A.	Independently acquired.
VCX	7842262	7844143	N.A.	Independently acquired.
VCX2	8169944	8171267	N.A.	Independently acquired.
VCX3B	8464830	8466510	N.A.	Independently acquired.
FAM9A	8790795	8801383	N.A.	Lineage-specific duplication: probable gene family member of mouse Xlr and cat SYCP3L.
FAM9B	9024232	9197176	N.A.	Lineage-specific duplication: probable gene family member of mouse Xlr and cat SYCP3L.
FAM9C	13035617	13044798	N.A.	Lineage-specific duplication: probable gene family member of mouse Xlr and cat SYCP3L.
LOC105373133	13044544	13086975	N.A.	Independently acquired.
ATXN3L	13318647	13320399	N.A.	Independently acquired.
CBLL2	22272913	22274461	N.A.	Lineage-specific duplication.
SUPT20HL2	24310862	24313315	N.A.	Independently acquired.
SUPT20HL1	24362761	24365424	N.A.	Independently acquired.
DCAF8L1	27977993	27981449	N.A.	Lineage-specific duplication: DCAF8L2.
MAGEB2 (duplicate of MAGEB4)	30215558	30220089	N.A.	Lineage-specific duplication.
MAGEB1(duplicate of MAGEB4)	30243731	30252038	N.A.	Lineage-specific duplication.
FAM47B	34942796	34944917	N.A.	Lineage-specific duplication.
LOC105373154 (MIB-like)	36902398	36959104	N.A.	Independently acquired.
LOC107985687 (EIF2L)	40101736	40106486	N.A.	Independently acquired.
KRBOX4	46447292	46473669	N.A.	Lineage-specific duplication.
SPACA5B (SPACA5 dup)	48130657	48132613	N.A.	Lineage-specific duplication.
SSX3	48346428	48356753	N.A.	Lineage-specific duplication.
SSX4	48383527	48393343	Ampliconic	Lineage-specific duplication.
SSX4B	48402082	48411910	Ampliconic	Lineage-specific duplication.
GAGE12J	49322030	49329387	N.A.	Lineage-specific duplication.
GAGE13	49331603	49338952	N.A.	Lineage-specific duplication.
GAGE12B	49341183	49529921	N.A.	Lineage-specific duplication.
GAGE12C	49532177	49539541	Ampliconic	Lineage-specific duplication.
GAGE12D	49541722	49549107	Ampliconic	Lineage-specific duplication.
GAGE12E	49551289	49558649	Ampliconic	Lineage-specific duplication.
GAGE12F	49560808	49568208	Ampliconic	Lineage-specific duplication.
GAGE12G	49570400	49577757	Ampliconic	Lineage-specific duplication.
GAGE12H	49579949	49587304	Ampliconic	Lineage-specific duplication.
GAGE2A	49589515	49596827	Ampliconic	Lineage-specific duplication.
GAGE1	49598992	49608536	Ampliconic	Lineage-specific duplication.
PAGE1	49687450	49696019	N.A.	Lineage-specific duplication.
CENPVL2	51681212	51682831	Ampliconic	Independently acquired.
CENPVL1	51710512	51712131	Ampliconic	Independently acquired.
MAGED4B	52061827	52069272	Ampliconic	Lineage-specific duplication.
XAGE2	52368996	52375683	Ampliconic	Lineage-specific duplication.
XAGE1B	52495668	52500815	Ampliconic	Lineage-specific duplication.
XAGE1E (XAGE1E)	52512074	52517221	Ampliconic	Lineage-specific duplication.
SSX7	52644061	52654900	Ampliconic	Lineage-specific duplication.
SSX2	52696896	52707227	Ampliconic	Lineage-specific duplication.
SSX2B	52751204	52761536	Ampliconic	Lineage-specific duplication.
SPANXN5	52796146	52797348	Ampliconic	Independently acquired.
XAGE5	52811295	52818301	Ampliconic	Lineage-specific duplication.
XAGE3	52862528	52868140	Ampliconic	Lineage-specific duplication.
FAM156B	52891599	52908560	Ampliconic	Lineage-specific duplication.
PAGE2	55089052	55092836	N.A.	Lineage-specific duplication.
FAM104B	55143102	55161195	N.A.	Lineage-specific duplication.
MTRNR2L10	55181391	55182511	N.A.	Lineage-specific duplication.
PAGE5	55220347	55224108	N.A.	Lineage-specific duplication.
PAGE3	55257833	55264916	N.A.	Lineage-specific duplication.
SPIN2A	57134259	57138688	N.A.	Lineage-specific duplication.
ZXDA	57905430	57910633	N.A.	Lineage-specific duplication.
LOC105373242	69031120	69084509	N.A.	Independently acquired.
LOC105373244	70427358	70436800	N.A.	Independently acquired.
CXorf49B	71763290	71767201	Ampliconic	Lineage-specific duplication.
FLJ44635	72144184	72161750	N.A.	Independently acquired.
FAM236B	72781865	72782660	Ampliconic	Lineage-specific duplication.
FAM236D	72807425	72808819	Ampliconic	Lineage-specific duplication.
PABPC1L2B (Hominin-sp. duplicate)	73003513	73005712	N.A.	Lineage-specific duplication.
PGAM4	77967961	77969638	N.A.	Lineage-specific duplication.
RPA4	96883908	96885467	N.A.	Lineage-specific duplication.
LOC105373297 (ERVFC1)	97841749	97849381	N.A.	Lineage-specific duplication.
NXF2B	102360395	102440008	Ampliconic	Lineage-specific duplication.
RAB40AL	102937272	102938300	N.A.	Independently acquired.
RAB40A	103493266	103519489	N.A.	Independently acquired.
H2BFWT	104011147	104013687	N.A.	Independently acquired.
LOC101928589	110175773	110177788	N.A.	Independently acquired.
RBMXL3	115189400	115192868	N.A.	Independently acquired.
LOC105373314	115454266	115465553	N.A.	Independently acquired.
RHOXF2B	120072264	120077742	Ampliconic	Lineage-specific duplication.
RHOXF2	120158534	120164039	Ampliconic	Lineage-specific duplication.
CT47B1	120872554	120875925	N.A.	Lineage-specific duplication.
CT47A12	120877490	120932399	N.A.	Lineage-specific duplication.
CT47A11	120933840	120937260	Ampliconic	Lineage-specific duplication.
CT47A10	120938701	120942121	Ampliconic	Lineage-specific duplication.
CT47A9	120943561	120946981	Ampliconic	Lineage-specific duplication.
CT47A8	120948422	120951842	Ampliconic	Lineage-specific duplication.
CT47A7	120953282	120956600	Ampliconic	Lineage-specific duplication.
CT47A6	120958165	120961588	Ampliconic	Lineage-specific duplication.
CT47A5	120963026	120966446	Ampliconic	Lineage-specific duplication.
CT47A4	120967886	120971306	Ampliconic	Lineage-specific duplication.
CT47A3	120972746	120976166	Ampliconic	Lineage-specific duplication.
CT47A2	120977606	120981026	Ampliconic	Lineage-specific duplication.
GLUD2	121047608	121049942	N.A.	Independently acquired.
TFDP3	133216669	133218348	N.A.	Independently acquired.
SMIM10L2B	135094985	135098634	N.A.	Lineage-specific duplication - paralogs SMIM10L2A, SMIM10 X-linked
ETDA	135252012	135255796	Ampliconic	Independently acquired.
CT45A1	135708398	135723318	Ampliconic	Lineage-specific duplication.
CT45A3	135760067	135768222	Ampliconic	Lineage-specific duplication.
CT45A5	135777130	135785512	Ampliconic	Lineage-specific duplication.
CT45A6	135794687	135802755	Ampliconic	Lineage-specific duplication.
CT45A2	135811979	135820062	Ampliconic	Lineage-specific duplication.
CT45A7	135829229	135837317	Ampliconic	Lineage-specific duplication.
CT45A8	135846497	135854588	Ampliconic	Lineage-specific duplication.
CT45A9	135863418	135871812	Ampliconic	Lineage-specific duplication.
CT45A10	135880752	135893577	Ampliconic	Lineage-specific duplication.
SPANXB1	141002591	141003706	Ampliconic	Independently acquired.
SPANXC	141241463	141242550	Ampliconic	Independently acquired.
SPANXA1	141583674	141584738	Ampliconic	Independently acquired.
SPANXA2	141589708	141590772	N.A.	Independently acquired.
LOC645188	141625864	141626733	N.A.	Independently acquired.
SPANXD	141697401	141698739	N.A.	Independently acquired.
MAGEC3	141838316	141897832	N.A.	Lineage-specific duplication.
MAGEC1	141903856	141909401	N.A.	Lineage-specific duplication.
MAGEC2	142202342	142205290	N.A.	Lineage-specific duplication.
SPANXN4	143025918	143038637	N.A.	Independently acquired.
SPANXN3	143508735	143517475	N.A.	Independently acquired.
SPANXN2	143712035	143720668	N.A.	Independently acquired.
SPANXN1	145247587	145256208	N.A.	Independently acquired.
CXorf51B	146809784	146810411	Ampliconic	Independently acquired.
CXorf51A	146814104	146814731	Ampliconic	Independently acquired.
LOC105373347 (PPHLN1L)	147181049	147271945	N.A.	Independently acquired.
HSFX3	149548210	149549852	N.A.	Lineage-specific duplication of HSX4.
MAGEA9B	149581653	149587468	Ampliconic	Lineage-specific duplication.
MAGEA11	149688202	149717268	Ampliconic	Lineage-specific duplication.
HSFX1	149774068	149776859	Ampliconic	Lineage-specific duplication of HSFX2 (not related to HSFX3 and HSX4).
MAGEA9	149781921	149787737	Ampliconic	Lineage-specific duplication.
MAGEA10-MAGEA5	152114049	152138578	N.A.	Lineage-specific duplication.
CSAG2	152708261	152713861	Ampliconic	Independently acquired.
MAGEA2B	152714529	152718607	Ampliconic	Lineage-specific duplication.
CSAG1	152727484	152733736	Ampliconic	Independently acquired.
MAGEA12	152733779	152737669	Ampliconic	Lineage-specific duplication.
CSAG3	152753921	152760222	Ampliconic	Independently acquired.
OPN1MW2	154219734	154233286	Ampliconic	Lineage-specific duplication.
OPN1MW3	154257620	154271068	Ampliconic	Lineage-specific duplication.
CTAG1A	154585154	154586816	Ampliconic	Lineage-specific duplication.
CTAG1B	154617609	154619271	Ampliconic	Lineage-specific duplication.
IL9R	155997581	156013017	N.A.	Independently acquired.

## Sheet: SupplementalTableS7
Supplemental Table S7. Locations of novel genes on the domestic cat X chromosome. Genes within ampliconic regions are italicized, underlined, and in bold.
Gene Name	Cat Start	Cat End	Status	Origin
LOC102901245 (STAG2-like)	134637	198935	N.A.	Lineage-specific duplication of STAG2 at chrX:103639232
LOC111558781 (STAG2-like)	199003	207366	N.A.	Lineage-specific duplication of STAG2 at chrX:103639232
LOC102901718 (CSF2RA-like)	1000391	1023639	N.A.	Lineage-specific duplication of neighboring gene.
LOC109496913	1135898	1139304	N.A.	Independently acquired.
LOC111558770	1156778	1159735	N.A.	Independently acquired.
LOC109496425 (COL1A1-like)	7099539	7124318	N.A.	Independently acquired.
LOC101087815 (CLDN34-like)	7315456	7316115	N.A.	Lineage-specific duplication of neighboring gene.
LOC101086788 (RPL36A-like)	13225739	13226878	N.A.	Lineage-specific duplication of RPL36A at chrX:83312482.
LOC105261399 (SIAH1-like)	13277526	13280230	N.A.	Independently acquired.
LOC102899587 (GJA1-like)	15116750	15122803	N.A.	Independently acquired.
LOC101089581(SNRPN-like)	15755581	15774652	N.A.	Independently acquired.
LOC101097703	20032463	20032949	N.A.	Independently acquired.
LOC101092829 (TAF10-like)	20037757	20038541	N.A.	Independently acquired.
FELCATV1R3	21603090	21603992	N.A.	Independently acquired.
LOC105261400 (MAGEB4L)	22294290	22295724	N.A.	Lineage-specific duplication.
LOC111558670 (MAGEB17L)	22330125	22331507	N.A.	Lineage-specific duplication.
LOC493964 (MAGE)	23746635	23748892	N.A.	Lineage-specific duplication.
LOC109496467 (MAGEB2L)	26048108	26051768	N.A.	Lineage-specific duplication.
LOC109496468	26201750	26477535	N.A.	Independently acquired.
LOC101081960 (FAM47E-like)	32806091	32807733	N.A.	Lineage-specific duplication.
LOC111558783(H2A-Bbd type 1-like)	33715045	33716293	Ampliconic	Lineage-specific duplication
LOC101100947	43155241	43156457	N.A.	Independently acquired.
LOC102899730 (PAGE-like)	44806692	44814275	N.A.	Lineage-specific duplication.
LOC101088142	45159982	45161014	N.A.	Independently acquired.
LOC111558733 (MAGE-like)	45393095	45399288	N.A.	Lineage-specific duplication.
31J21-174L20_Transcript1	46642669	46837270	N.A.	Independently acquired.
FCAB-205P3...127P13_Transcript1	49065362	49066904	Ampliconic	Independently acquired.
LOC105260211 (YBX3-like)	50184537	50192765	Ampliconic	Independently acquired.
LOC109496915	54062494	54069862	N.A.	Independently acquired.
LOC102899556 (GCSH-like)	57485494	57490985	N.A.	Independently acquired.
LOC109496376	57970243	57974928	N.A.	Independently acquired.
DDX46L	61407550	61411377	Ampliconic	Independently acquired.
LOC111558674 (FOXD1-like)	61637941	61640845	N.A.	Independently acquired.
FCAB-256L9_Transcript	62018443	62022998	N.A.	Independently acquired.
LOC111558772 (PNN-like)	63241162	63244249	N.A.	Independently acquired.
SH3BGRL3-like	68626417	68630019	N.A.	Independently acquired.
LOC109496330	70389127	70389574	N.A.	Independently acquired.
LOC102901599	72186990	72264077	Ampliconic	Lineage-specific duplication of TEX16.
LOC102899136	72264803	72269744	N.A.	Lineage-specific duplication of TEX16.
LOC111558675	73253100	73258025	N.A.	Independently acquired.
TEN1L	76758100	76758736	N.A.	Independently acquired.
LOC111558778	78697269	78703760	N.A.	Independently acquired.
LOC111558676	81712294	81717482	N.A.	Independently acquired.
ARMCX6L	83436552	83448761	N.A.	Lineage-specific duplication.
LOC111556301 (NFX2-like)	84197261	84199681	N.A.	Independently acquired.
LOC109496557	84421549	84422867	N.A.	Independently acquired.
LOC101101037 (SUMO2-like)	88751919	88913565	N.A.	Independently acquired.
LOC111558744 (WAS-like)	89806259	89807504	N.A.	Lineage-specific duplication of WAS gene at chrX:42762176.
LOC111556295	96268507	96273224	N.A.	Independently acquired.
LOC105259672 (CT47A-like)	99555530	99558490	N.A.	Lineage-specific duplication
LOC111558775 (Rhox2b-like)	100403905	100412811	N.A.	Lineage-specific duplication.
LOC101093839 (RHOXF1)	100457942	100491105	N.A.	Lineage-specific duplication.
LOC111558717 (SLC25A5-like)	105286333	105289452	N.A.	Lineage-specific duplication.
LOC109496610 (COXB1-like)	112785295	112785825	N.A.	Independently acquired.
FCAB-89F20_Transcript1	113260518	113371029	N.A.	Independently acquired.
LOC102901637 (INTS6LB)	113989641	113995777	N.A.	Lineage-specific duplication.
LOC102900259 (INTS6LC)	114029238	114037881	N.A.	Lineage-specific duplication.
LOC102901675 (INTS6LD)	114066472	114075813	N.A.	Lineage-specific duplication.
LOC101083152	114371227	114374873	N.A.	Independently acquired.
LOC102899102 (TNP4L)	117523369	117524122	N.A.	Lineage-specific duplication.
LOC101091265 (ELL2)	122289789	122297994	N.A.	Lineage-specific duplication.
LOC111558784 (MAGE8L)	126654649	126681609	N.A.	Lineage-specific duplication.
LOC105260348 (MAGE9L)	126683205	126684538	N.A.	Lineage-specific duplication.
LOC111558732 (MAGE9L)	126683304	126684540	N.A.	Lineage-specific duplication.
LOC111558691 (MAGE10L)	126824121	126854014	N.A.	Lineage-specific duplication.
LOC111558735 (MUM1L1L)	127954795	127956758	N.A.	Lineage-specific duplication.
FCAB-331E2-_Transcript	128973412	128976005	N.A.	Independently acquired.
FCAB-331E3_Transcript2	128981795	128986452	N.A.	Independently acquired.
FCAB-331E3_Transcript3	129004897	129011236	N.A.	Independently acquired.
FCAB-331E2_Transcript4	129011378	129012810	N.A.	Independently acquired.
FCAB-331E3_Transcript5	129021032	129022179	N.A.	Independently acquired.
LOC105259690 (SLC6A8-like)	129142593	129299960	N.A.	Lineage-specific duplication.
GTPBP6AL	130326918	130332874	N.A.	Lineage-specific duplication from PAR1.
PLCXD1L	130337072	130366478	N.A.	Lineage-specific duplication from PAR1.

## Sheet: SupplementalTableS8
Supplemental Table S8. Locations of novel genes on the mouse X chromosome. Genes within ampliconic regions are italicized, underlined, and in bold.
Gene Name	Mouse Start	Mouse End	Status	Origin
Btbd35f23	3076920	3078823	N.A.	Lineage-specific duplication - Btbd35f gene family shared by some Laurasiatherians [Supplementary Figure 15]
Btbd35f11	3441731	3443690	Ampliconic	Lineage-specific duplication - Btbd35f gene family shared by some Laurasiatherians.
Btbd35f18	3700233	3702192	Ampliconic	Lineage-specific duplication - Btbd35f gene family shared by some Laurasiatherians.
Btbd35f10	3750931	3752885	Ampliconic	Lineage-specific duplication - Btbd35f gene family shared by some Laurasiatherians.
Btbd35f16	3955043	3957002	Ampliconic	Lineage-specific duplication - Btbd35f gene family shared by some Laurasiatherians.
Btbd35f3	4037674	4039622	Ampliconic	Lineage-specific duplication - Btbd35f gene family shared by some Laurasiatherians.
Btbd35f28	4196576	4198535	Ampliconic	Lineage-specific duplication - Btbd35f gene family shared by some Laurasiatherians.
Btbd35f20	4289286	4291245	Ampliconic	Lineage-specific duplication - Btbd35f gene family shared by some Laurasiatherians.
Btbd35f17	4370636	4372595	Ampliconic	Lineage-specific duplication - Btbd35f gene family shared by some Laurasiatherians.
Btbd35f4	4800411	4802359	Ampliconic	Lineage-specific duplication - Btbd35f gene family shared by some Laurasiatherians.
Btbd35f27	4952135	4954077	Ampliconic	Lineage-specific duplication - Btbd35f gene family shared by some Laurasiatherians.
Mycs	5466904	5469265	N.A.	Independently acquired.
Btbd35f7	5669067	5671026	N.A.	Lineage-specific duplication - Btbd35f gene family shared by some Laurasiatherians.
Ssxb10	8327424	8336235	N.A.	Lineage-specific duplication - SSX gene family found in other placental mammals. [Supplementary Figure 12]
Ssxb9	8366978	8375388	N.A.	Lineage-specific duplication - SSX gene family found in other placental mammals.
Ssxb1	8413305	8422158	N.A.	Lineage-specific duplication - SSX gene family found in other placental mammals.
Ssxb2	8454343	8461726	N.A.	Lineage-specific duplication - SSX gene family found in other placental mammals.
Gm14459	8513543	8526726	N.A.	Lineage-specific duplication - SSX gene family found in other placental mammals.
Ssxb6	8542604	8548255	N.A.	Lineage-specific duplication - SSX gene family found in other placental mammals.
Ssxb3	8583404	8591810	N.A.	Lineage-specific duplication - SSX gene family found in other placental mammals.
Ssxb7	8639607	8645722	N.A.	Lineage-specific duplication - SSX gene family found in other placental mammals.
Ssxb8	8684843	8690891	N.A.	Lineage-specific duplication - SSX gene family found in other placental mammals.
Ssx9	8743792	8756633	N.A.	Lineage-specific duplication - SSX gene family found in other placental mammals.
Gm6592	8843994	8849607	N.A.	Lineage-specific duplication - SSX gene family found in other placental mammals.
Gm5751	8871568	8875407	N.A.	Lineage-specific duplication - SSX gene family found in other placental mammals.
Fthl17b	8962134	8962975	N.A.	Lineage-specific duplication - FTHL17 ancestral gene family.
Fthl17c	8975718	8976559	N.A.	Lineage-specific duplication - FTHL17 ancestral gene family.
Fthl17d	8985940	8986672	N.A.	Lineage-specific duplication - FTHL17 ancestral gene family.
Fthl17e	9033486	9034333	N.A.	Lineage-specific duplication - FTHL17 ancestral gene family.
Fthl17f	9063090	9063822	N.A.	Lineage-specific duplication - FTHL17 ancestral gene family.
4930402K13Rik (Fam47c duplicate)	9104562	9106342	N.A.	Lineage-specific duplication.
H2al1m	9283764	9284288	N.A.	Lineage-specific gene family - H2A family [Supplementary Figure 7]
H2al1k	9350599	9351137	N.A.	Lineage-specific gene family - H2A family.
H2al1o	9571960	9572391	N.A.	Lineage-specific gene family - H2A family.
H2al3	9849703	9850252	N.A.	Lineage-specific gene family - H2A family.
H2al1a	11299257	11299757	Ampliconic	Lineage-specific gene family - H2A family.
H2a1b	11302432	11302921	Ampliconic	Lineage-specific gene family - H2A family.
H2a1c	11305655	11305972	Ampliconic	Lineage-specific gene family - H2A family.
H2a1d	11308824	11309141	Ampliconic	Lineage-specific gene family - H2A family.
H2al1e	11311934	11312427	Ampliconic	Lineage-specific gene family - H2A family.
H2a1f	11315158	11315475	Ampliconic	Lineage-specific gene family - H2A family.
H2a1g	11318256	11318764	Ampliconic	Lineage-specific gene family - H2A family.
H2a1h	11321453	11321894	Ampliconic	Lineage-specific gene family - H2A family.
H2a1i	11324659	11324976	Ampliconic	Lineage-specific gene family - H2A family.
H2a1j	11327822	11328151	Ampliconic	Lineage-specific gene family - H2A family.
H2al1n	14211148	14211657	N.A.	Lineage-specific gene family - H2A family.
Cypt1	16522869	16523691	N.A.	Independently acquired.
Tex13c3	19479424	19481319	N.A.	Lineage-specific duplication.
Ssxa1 (Ssxb paralog)	21118414	21122088	N.A.	Lineage-specific duplication - SSX gene family found in other placental mammals.
Gm4907	23882524	23907602	N.A.	Independently acquired.
Gm5934	24474308	24499163	N.A.	Lineage-specific duplication - these are members of an ancient gene family related to X-linked SYCP3L shared by other superordinal clades [Supplementary Figure 14]
Gm4297	24552250	24573305	N.A.	Lineage-specific duplication - these are members of an ancient gene family related to X-linked SYCP3L shared by other superordinal clades
Gm5935	24753162	24775164	N.A.	Lineage-specific duplication - these are members of an ancient gene family related to X-linked SYCP3L shared by other superordinal clades
Gm5169	25277487	25301455	Ampliconic	Lineage-specific duplication - these are members of an ancient gene family related to X-linked SYCP3L shared by other superordinal clades
Gm1993	25548501	25570449	N.A.	Lineage-specific duplication - these are members of an ancient gene family related to X-linked SYCP3L shared by other superordinal clades
Gm5168	26028214	26051041	Ampliconic	Lineage-specific duplication - these are members of an ancient gene family related to X-linked SYCP3L shared by other superordinal clades
Gm2012	26200882	26231323	Ampliconic	Lineage-specific duplication - these are members of an ancient gene family related to X-linked SYCP3L shared by other superordinal clades
Gm2030	26287199	26310044	Ampliconic	Lineage-specific duplication - these are members of an ancient gene family related to X-linked SYCP3L shared by other superordinal clades
Slx	26522657	26545565	Ampliconic	Lineage-specific duplication - these are members of an ancient gene family related to X-linked SYCP3L shared by other superordinal clades
Gm14525	26672780	26702638	Ampliconic	Lineage-specific duplication - these are members of an ancient gene family related to X-linked SYCP3L shared by other superordinal clades
Gm6121	26912743	26935669	Ampliconic	Lineage-specific duplication - these are members of an ancient gene family related to X-linked SYCP3L shared by other superordinal clades
Gm10230	27472033	27494939	Ampliconic	Lineage-specific duplication - these are members of an ancient gene family related to X-linked SYCP3L shared by other superordinal clades
Gm10058	27924021	27946885	Ampliconic	Lineage-specific duplication - these are members of an ancient gene family related to X-linked SYCP3L shared by other superordinal clades
Gm4836	28270710	28293632	Ampliconic	Lineage-specific duplication - these are members of an ancient gene family related to X-linked SYCP3L shared by other superordinal clades
Gm10147	28584995	28607874	Ampliconic	Lineage-specific duplication - these are members of an ancient gene family related to X-linked SYCP3L shared by other superordinal clades
Gm10096	28931807	28954702	Ampliconic	Lineage-specific duplication - these are members of an ancient gene family related to X-linked SYCP3L shared by other superordinal clades
Gm10488	29976314	29999162	Ampliconic	Lineage-specific duplication - these are members of an ancient gene family related to X-linked SYCP3L shared by other superordinal clades
Gm14632	30329740	30352646	Ampliconic	Lineage-specific duplication - these are members of an ancient gene family related to X-linked SYCP3L shared by other superordinal clades
Gm10487	30820542	30843469	Ampliconic	Lineage-specific duplication - these are members of an ancient gene family related to X-linked SYCP3L shared by other superordinal clades
Btbd35f29	31117576	31119415	Ampliconic	Lineage-specific duplication - shared by some laurasiatherians (X-linked in cow), afrotherians. [Supplementary Figure 15]
LOC108168466 (SPIN2A-like)	31254636	31255381	Ampliconic	Lineage-specific duplication - SPIN2 gene families present on X chromosome throughout placental mammals.
Btbd35f26	31336219	31338442	Ampliconic	Lineage-specific duplication - shared by some laurasiatherians (X-linked in cow), afrotherians.
Btbd35f19	31381876	31384047	Ampliconic	Lineage-specific duplication - shared by some laurasiatherians (X-linked in cow), afrotherians.
Spin2e	31618191	31619833	Ampliconic	Lineage-specific duplication - SPIN2 gene families present on X chromosome throughout placental mammals.
Btbd35f25	31715299	31717235	Ampliconic	Lineage-specific duplication - shared by some laurasiatherians (X-linked in cow), afrotherians.
Gm21637	31960926	31962821	Ampliconic	Lineage-specific duplication - SPIN2 gene families present on X chromosome throughout placental mammals.
Btbd35f22	32047582	32049551	Ampliconic	Lineage-specific duplication - shared by some laurasiatherians (X-linked in cow), afrotherians.
Btbd35f2	32278394	32280342	Ampliconic	Lineage-specific duplication - shared by some laurasiatherians (X-linked in cow), afrotherians.
Gm21466	32437174	32438844	Ampliconic	Lineage-specific duplication - SPIN2 gene families present on X chromosome throughout placental mammals.
Btbd35f1	32560055	32562009	Ampliconic	Lineage-specific duplication - shared by some laurasiatherians (X-linked in cow), afrotherians.
Gm5926	32649778	32651426	Ampliconic	Lineage-specific duplication - SPIN2 gene families present on X chromosome throughout placental mammals.
Btbd35f21	32726137	32728057	Ampliconic	Lineage-specific duplication - shared by some laurasiatherians (X-linked in cow), afrotherians.
Btbd35f30	32894527	32896366	Ampliconic	Lineage-specific duplication - shared by some laurasiatherians (X-linked in cow), afrotherians.
Btbd35f5	32973897	32975846	Ampliconic	Lineage-specific duplication - shared by some laurasiatherians (X-linked in cow), afrotherians.
Btbd35f12	33313338	33315288	Ampliconic	Lineage-specific duplication - shared by some laurasiatherians (X-linked in cow), afrotherians.
LOC100862179 (SPIN2A-like)	33476982	33478575	Ampliconic	Lineage-specific duplication - SPIN2 gene families present on X chromosome throughout placental mammals.
Btbd35f15	33575387	33577346	Ampliconic	Lineage-specific duplication - shared by some laurasiatherians (X-linked in cow), afrotherians.
Btbd35f13	33657140	33659082	Ampliconic	Lineage-specific duplication - shared by some laurasiatherians (X-linked in cow), afrotherians.
Btbd35f14	33700649	33702349	Ampliconic	Lineage-specific duplication - shared by some laurasiatherians (X-linked in cow), afrotherians.
Gm46683	33777828	33778538	Ampliconic	Lineage-specific duplication - SPIN2 gene families present on X chromosome throughout placental mammals.
Btbd35f6	33954615	33956624	Ampliconic	Lineage-specific duplication - shared by some laurasiatherians (X-linked in cow), afrotherians.
Btbd35f9	34159642	34161734	Ampliconic	Lineage-specific duplication - shared by some laurasiatherians (X-linked in cow), afrotherians.
LOC108168468 (SPIN2A-like)	34237100	34238592	Ampliconic	Lineage-specific duplication - SPIN2 gene families present on X chromosome throughout placental mammals.
Btbd35f8	34450295	34452516	Ampliconic	Lineage-specific duplication - shared by some laurasiatherians (X-linked in cow), afrotherians.
Gm10486	35067384	35090316	Ampliconic	Lineage-specific duplication - these are members of an ancient gene family related to X-linked SYCP3L shared by other superordinal clades
Gm14819	35404215	35427094	Ampliconic	Lineage-specific duplication - these are members of an ancient gene family related to X-linked SYCP3L shared by other superordinal clades
Gm33383 (Ct47b-like)	36401263	36403446	N.A.	Lineage-specific duplication.
Gm6268 (Ct47-like)	36403477	36404654	N.A.	Lineage-specific duplication.
Gm9 (Rhox family member)	37208502	37211041	N.A.	Lineage-specific duplication - these are members of an ancient gene family related to X-linked SYCP3L shared by other superordinal clades
Rhox1	37213804	37222258	N.A.	Lineage-specific duplication - these are members of an ancient gene family related to X-linked SYCP3L shared by other superordinal clades
Rhox2a	37244992	37249690	N.A.	Lineage-specific duplication - these are members of an ancient gene family related to X-linked SYCP3L shared by other superordinal clades
Rhox3a	37249919	37258978	Ampliconic	Lineage-specific duplication - these are members of an ancient gene family related to X-linked SYCP3L shared by other superordinal clades
Rhox4a	37265067	37270136	Ampliconic	Lineage-specific duplication - these are members of an ancient gene family related to X-linked SYCP3L shared by other superordinal clades
Rhox3a2	37380383	37384431	Ampliconic	Lineage-specific duplication - these are members of an ancient gene family related to X-linked SYCP3L shared by other superordinal clades
Rhox4a2	37390860	37395621	Ampliconic	Lineage-specific duplication - these are members of an ancient gene family related to X-linked SYCP3L shared by other superordinal clades
Rhox2b	37411736	37416844	N.A.	Lineage-specific duplication - these are members of an ancient gene family related to X-linked SYCP3L shared by other superordinal clades
Rhox4b	37432494	37437278	N.A.	Lineage-specific duplication - these are members of an ancient gene family related to X-linked SYCP3L shared by other superordinal clades
Rhox2c	37453480	37458417	N.A.	Lineage-specific duplication - these are members of an ancient gene family related to X-linked SYCP3L shared by other superordinal clades
Rhox3c	37469868	37473961	N.A.	Lineage-specific duplication - these are members of an ancient gene family related to X-linked SYCP3L shared by other superordinal clades
Rhox4c	37480337	37485124	N.A.	Lineage-specific duplication - these are members of an ancient gene family related to X-linked SYCP3L shared by other superordinal clades
Rhox2d	37493410	37497715	N.A.	Lineage-specific duplication - these are members of an ancient gene family related to X-linked SYCP3L shared by other superordinal clades
Rhox4d	37514385	37519176	N.A.	Lineage-specific duplication - these are members of an ancient gene family related to X-linked SYCP3L shared by other superordinal clades
Rhox2e	37530322	37541851	N.A.	Lineage-specific duplication - these are members of an ancient gene family related to X-linked SYCP3L shared by other superordinal clades
Rhox3e	37546975	37550897	N.A.	Lineage-specific duplication - these are members of an ancient gene family related to X-linked SYCP3L shared by other superordinal clades
Rhox4e	37557412	37562283	N.A.	Lineage-specific duplication - these are members of an ancient gene family related to X-linked SYCP3L shared by other superordinal clades
Rhox2f	37571421	37576159	N.A.	Lineage-specific duplication - these are members of an ancient gene family related to X-linked SYCP3L shared by other superordinal clades
Rhox3f	37581352	37585496	N.A.	Lineage-specific duplication - these are members of an ancient gene family related to X-linked SYCP3L shared by other superordinal clades
Rhox4f	37602895	37607686	N.A.	Lineage-specific duplication - these are members of an ancient gene family related to X-linked SYCP3L shared by other superordinal clades
Rhox3g	37623431	37628139	N.A.	Lineage-specific duplication - these are members of an ancient gene family related to X-linked SYCP3L shared by other superordinal clades
Rhox2g	37639112	37643470	N.A.	Lineage-specific duplication - these are members of an ancient gene family related to X-linked SYCP3L shared by other superordinal clades
Rhox4g	37646501	37651327	N.A.	Lineage-specific duplication - these are members of an ancient gene family related to X-linked SYCP3L shared by other superordinal clades
Rhox3h	37657688	37668764	N.A.	Lineage-specific duplication - these are members of an ancient gene family related to X-linked SYCP3L shared by other superordinal clades
Rhox2h	37668997	37673277	N.A.	Lineage-specific duplication - these are members of an ancient gene family related to X-linked SYCP3L shared by other superordinal clades
Rhox5	37754608	37808878	N.A.	Lineage-specific duplication - these are members of an ancient gene family related to X-linked SYCP3L shared by other superordinal clades
Rhox6	37827055	37829857	N.A.	Lineage-specific duplication - these are members of an ancient gene family related to X-linked SYCP3L shared by other superordinal clades
Rhox7a	37831686	37841171	N.A.	Lineage-specific duplication - these are members of an ancient gene family related to X-linked SYCP3L shared by other superordinal clades
Rhox8	37874776	37890766	N.A.	Lineage-specific duplication - these are members of an ancient gene family related to X-linked SYCP3L shared by other superordinal clades
Rhox9	37899097	37901770	N.A.	Lineage-specific duplication - these are members of an ancient gene family related to X-linked SYCP3L shared by other superordinal clades
Rhox10	38066475	38071688	N.A.	Lineage-specific duplication - these are members of an ancient gene family related to X-linked SYCP3L shared by other superordinal clades
Rhox11	38076598	38085139	N.A.	Lineage-specific duplication - these are members of an ancient gene family related to X-linked SYCP3L shared by other superordinal clades
Rhox12	38104062	38110907	N.A.	Lineage-specific duplication - these are members of an ancient gene family related to X-linked SYCP3L shared by other superordinal clades
Rhox13	38120840	38129966	N.A.	Lineage-specific duplication - these are members of an ancient gene family related to X-linked SYCP3L shared by other superordinal clades
6030498E09Rik	38772780	38962688	N.A.	Independently acquired.
Cypt15	39346266	39346963	N.A.	Independently acquired.
Cypt14	39862919	39863604	N.A.	Independently acquired.
Olfr1320	49683504	49684463	N.A.	Lineage-specific duplication.
Olfr1321	49726973	49727932	N.A.	Lineage-specific duplication.
1700080O16Rik (Magea10L)	51968693	51972864	N.A.	Lineage-specific duplication.
1700013H16Rik (Sycp3l)	53742901	53757970	N.A.	Lineage-specific duplication - member of an ancient gene family related to X-linked SYCP3L shared by other superordinal clades
Zfp36l3	53772686	53776394	N.A.	Independently acquired.
Xlr	53777118	53797716	N.A.	Lineage-specific duplication - member of an ancient gene family related to X-linked SYCP3L shared by other superordinal clades [Supplementary Figure 14]
Gm16405 (duplicate of Slxl1)	54531166	54548016	Ampliconic	Lineage-specific duplication - member of an ancient gene family related to X-linked SYCP3L shared by other superordinal clades
Gm16430 (duplicate of Slxl1)	54622169	54639019	Ampliconic	Lineage-specific duplication - member of an ancient gene family related to X-linked SYCP3L shared by other superordinal clades
Slxl1	55226876	55243736	Ampliconic	Lineage-specific duplication - member of an ancient gene family related to X-linked SYCP3L shared by other superordinal clades
3830403N18Rik (Xlrl)	55839252	56153496	N.A.	Lineage-specific duplication - member of an ancient gene family related to X-linked SYCP3L shared by other superordinal clades
Gm773	56189827	56212886	N.A.	Lineage-specific duplication - member of an ancient gene family related to X-linked SYCP3L shared by other superordinal clades
4933402E13Rik	62282960	62292084	N.A.	Lineage-specific duplication in MAGE gene family.
3830417A13Rik	64173548	64178778	N.A.	Lineage-specific duplication in MAGE gene family.
Gm1140	67682900	67693562	Ampliconic	Lineage-specific duplication - member of an ancient gene family related to X-linked SYCP3L shared by other superordinal clades
Gm14692	67695698	67706258	N.A.	Lineage-specific duplication - member of an ancient gene family related to X-linked SYCP3L shared by other superordinal clades
Gm6812	68892373	68893053	N.A.	Independently acquired.
1700020N15Rik	69945281	69945980	N.A.	Independently acquired.
Xlr4a	73074343	73082526	N.A.	Lineage-specific duplication - member of an ancient gene family related to X-linked SYCP3L shared by other superordinal clades [Supplementary Figure 14]
Xlr3a	73086293	73097095	N.A.	Lineage-specific duplication - member of an ancient gene family related to X-linked SYCP3L shared by other superordinal clades
Xlr5a	73107621	73119113	Ampliconic	Lineage-specific duplication - member of an ancient gene family related to X-linked SYCP3L shared by other superordinal clades
DXBay18 (MUM1L1-like)	73137223	73149450	Ampliconic	Lineage-specific duplication - MUM1L1 at chrX:139210030.
Xlr5b	73147383	73158886	Ampliconic	Lineage-specific duplication - member of an ancient gene family related to X-linked SYCP3L shared by other superordinal clades
Spin2d	73175302	73176989	N.A.	Lineage-specific duplication - SPIN2 gene families present on X chromosome throughout placental mammals.
Xlr3b	73192150	73202930	N.A.	Lineage-specific duplication - member of an ancient gene family related to X-linked SYCP3L shared by other superordinal clades
Xlr4b	73214321	73222453	N.A.	Lineage-specific duplication - member of an ancient gene family related to X-linked SYCP3L shared by other superordinal clades
F8a	73228306	73230795	N.A.	Lineage-specific duplication.
Xlr4c	73234076	73243130	N.A.	Lineage-specific duplication - member of an ancient gene family related to X-linked SYCP3L shared by other superordinal clades
Xlr3c	73254538	73265576	N.A.	Lineage-specific duplication - member of an ancient gene family related to X-linked SYCP3L shared by other superordinal clades
Xlr5c	73283361	73293970	N.A.	Lineage-specific duplication - member of an ancient gene family related to X-linked SYCP3L shared by other superordinal clades
Gm44504	74367447	74373349	N.A.	Lineage-specific duplication of UBL4A.
Gm6880 (Ctag2 duplicate)	74480117	74481544	N.A.	Lineage-specific duplication.
Gm5640 (MUM1L1-like)	74639114	74646110	Ampliconic	Lineage-specific duplication - MUM1L1 at chrX:139210030.
Gm6890 (CTAG2 like 2)	74740927	74742188	Ampliconic	Lineage-specific duplication.
Gm5936 (MUM1L1-like)	74836722	74843369	Ampliconic	Lineage-specific duplication - MUM1L1 at chrX:139210030.
Cldn34b3	76264306	76267673	N.A.	Lineage-specific duplication.
Cldn34b4	76385323	76397979	N.A.	Lineage-specific duplication.
Cldn34d	76582610	76602924	N.A.	Lineage-specific duplication.
Gm14744 (OBP duplicate)	77864758	77870033	N.A.	Lineage-specific duplication - OBP at chrX:77837898.
5430402E10Rik (Obp1-like)	77919786	77925062	N.A.	Lineage-specific duplication.
Obp1a	78085505	78091374	N.A.	Lineage-specific duplication.
Gm5938	78125467	78130403	N.A.	Lineage-specific duplication.
Obp1b	78186808	78192242	N.A.	Lineage-specific duplication.
Gm14743	78240462	78245921	N.A.	Lineage-specific duplication.
4930480E11Rik	78369643	78371128	N.A.	Lineage-specific duplication.
Gm8787	79330513	79358068	N.A.	Lineage-specific duplication of CFAP47 at chrX:79482568.
Tsga8	83486674	83487924	N.A.	Independently acquired.
Samt3	86044199	86047313	N.A.	Lineage-specific duplication.
4930415L06Rik	89930097	89932852	N.A.	Lineage-specific duplication - PPP4R3C ortholog.
Gm5072 (Mageb6b1)	91392500	91393534	N.A.	Lineage-specific duplication in MAGE gene family.
Gm14781 (Mageb5b)	91624249	91635671	Ampliconic	Lineage-specific duplication in MAGE gene family.
LOC108168446 (Mageb2L)	91625353	91626477	Ampliconic	Lineage-specific duplication in MAGE gene family.
Mageb1	92015191	92016333	N.A.	Lineage-specific duplication in MAGE gene family.
Pgr15l	97072596	97082104	N.A.	Independently acquired.
Gm3858	101818196	101821816	N.A.	Independently acquired.
LOC102632256 (Dmrtc1-like)	102764035	102779496	N.A.	Lineage-specific duplication.
Dmrtc1c1	102797880	102809950	N.A.	Lineage-specific duplication.
Dmrtc1c2	102847631	102857207	N.A.	Lineage-specific duplication.
1700031F05Rik (Dmrtc1-like)	102859166	102866353	N.A.	Lineage-specific duplication.
LOC102632367 (Dmrtc1-like)	102880507	102882317	N.A.	Lineage-specific duplication.
Cypt2	105499772	105500639	N.A.	Independently acquired.
Gm732 (Wmp)	107945735	107948436	N.A.	Independently acquired.
Gm34521	109445438	109558772	N.A.	Independently acquired.
Ube2dnl1	114905012	114905941	N.A.	Independently acquired.
Ube2dnl2	114907582	114908510	N.A.	Independently acquired.
Tgif2lx2	118427227	118428258	N.A.	Lineage-specific duplication.
Cldn34c1	123103523	123145654	Ampliconic	Lineage-specific duplication.
Srsx	123220985	123222475	Ampliconic	Independently acquired.
Gm2411 (Cldn34 like)	123346785	123378718	Ampliconic	Lineage-specific duplication.
Cldn34c2	123576307	123605024	Ampliconic	Lineage-specific duplication.
Cldn34c3	123788212	123823149	Ampliconic	Lineage-specific duplication.
Gm5945	124016018	124044356	Ampliconic	Lineage-specific duplication.
Vmn2r121	124127339	124135910	Ampliconic	Lineage-specific duplication.
4932411N23Rik	126812462	126834004	N.A.	Independently acquired.
Gm382	127039972	127063986	N.A.	Independently acquired.
Cldn34c4	127721175	127736554	N.A.	Lineage-specific duplication.
Gm15023 (Prame-like)	135167470	135177653	Ampliconic	Lineage-specific duplication.
Pramel3	135302289	135312636	Ampliconic	Lineage-specific duplication.
Gm5128 (Prame-like)	135373250	135383393	Ampliconic	Lineage-specific duplication.
Gm7903 (Prame-like)	135433802	135443997	Ampliconic	Lineage-specific duplication.
AV320801 (Prame-like)	135494554	135504748	Ampliconic	Lineage-specific duplication.
Nxf7	135579555	135598777	N.A.	Lineage-specific duplication.
Arxes1	136033367	136034946	N.A.	Independently acquired.
Kir3dl2	136447841	136544052	N.A.	Independently acquired.
Kir3dl1	136517999	136534306	N.A.	Independently acquired.
Tmsb15b2	136954988	136957979	N.A.	Independently acquired.
Tmsb15b1	136974022	136976874	N.A.	Independently acquired.
4930513O06Rik	139086243	139093403	N.A.	Independently acquired.
4933428M09Rik	139179215	139181009	N.A.	Independently acquired.
Trap1a	139333683	139338169	N.A.	Independently acquired.
GM15128	147789653	147833116	Ampliconic	Independently acquired.
GM15080 (Ott-like duplicate)	147992993	148033174	Ampliconic	Independently acquired.
GM15107 (Ott-like duplicate)	148180675	148224710	Ampliconic	Independently acquired.
GM15127	148663588	148703849	Ampliconic	Independently acquired.
Gm15093 (Ott-like duplicate)	149272377	149305003	Ampliconic	Independently acquired.
Gm15085 (Ott-like duplicate)	149447617	149487784	Ampliconic	Independently acquired.
Gm10439 (Ott-like duplicate)	149594601	149636621	Ampliconic	Independently acquired.
Gm15097 (Ott-like duplicate)	149784424	149826694	Ampliconic	Independently acquired.
Gm15091 (Luzp4-like duplicate)	149941387	149984982	Ampliconic	Lineage-specific duplication.
Gm20153 (FAM156A/FAM156B-like)	150157426	150177319	N.A.	Lineage-specific duplication.
Gm15104	150311924	150336719	N.A.	Independently acquired.
Gm15266	152110432	152111413	N.A.	Unclear
Cypt3	153558593	153559435	N.A.	Independently acquired.
Kctd12b	153685154	153696386	N.A.	Independently acquired.
Samt1	154001590	154012640	Ampliconic	Independently acquired.
4921511M17Rik (Samt1d)	154022780	154033827	Ampliconic	Independently acquired.
Gm10057 (Samt1c)	154043986	154055041	Ampliconic	Independently acquired.
Gm15143 (Sam2-like)	154065195	154069350	Ampliconic	Independently acquired.
Gm15140 (Samt1d)	154109633	154120685	N.A.	Independently acquired.
4930524N10Rik (Samt2b)	154339225	154343392	N.A.	Independently acquired.
Samt4	154482002	154484682	N.A.	Independently acquired.
Samt2	154575228	154579330	N.A.	Independently acquired.
Gm15142	154635586	154639130	N.A.	Independently acquired.
Cldn34b1	154886803	154913643	N.A.	Lineage-specific duplication.
Cldn34b2	155124917	155147849	N.A.	Lineage-specific duplication.
LOC108168453 (Bend2-like)	161297856	161334722	N.A.	Lineage-specific duplication.
Rnf138rt1	163760139	163761332	N.A.	Independently acquired.
Siah1b	164070703	164076493	N.A.	Independently acquired.

## Sheet: SupplementalTableS9
Supplemental Table S9. Locations of novel genes on the pig X chromosome. Genes within ampliconic regions are italicized, underlined, and in bold.
Gene Name	Pig Start	Pig End	Status	Origin
LOC110257789	418073	433468	N.A.	Independently acquired.
LOC110257836	2127385	2145225	N.A.	Independently acquired.
LOC110257838	6295275	6296381	N.A.	Independently acquired.
LOC110257839	9501052	9505154	N.A.	Independently acquired.
CXH4orf3	12139795	12141315	N.A.	Independently acquired.	1
LOC100513448 (MAGEB4L)	22170175	22171346	N.A.	Lineage-specific duplication.
LOC100157863 (APOPT1)	22381742	22382524	N.A.	Independently acquired.
LOC100156962 (MAGEB10L)	23652358	23653374	N.A.	Lineage-specific duplication.
LOC102159844 (MAGEB4L)	25895424	26030203	N.A.	Lineage-specific duplication.
LOC100623332 (MAGEB16L)	31357792	31721181	Ampliconic	Lineage-specific duplication.
LOC100522230 (MAGEB16L)	31573305	31574593	Ampliconic	Lineage-specific duplication.
LOC100522411 (MAGEB16L)	31592308	31597919	Ampliconic	Lineage-specific duplication.
LOC100623432 (MAGEB16L)	31752126	31753755	Ampliconic	Lineage-specific duplication.
LOC100520818 (MAGEB16L)	31759602	31780300	Ampliconic	Lineage-specific duplication.
LOC110257841 (H2A-Bbd type 1-like)	33299003	33299753	N.A.	Lineage-specific gene family - H2A family.
LOC100624295 (H2A-Bbd type 1-like)	33307648	33308398	N.A.	Lineage-specific gene family - H2A family.
LOC100736633 (H2A-Bbd type 1-like)	33894983	33895366	N.A.	Lineage-specific gene family - H2A family.
LOC106506945 (SRRM1L)	35880111	35904287	N.A.	Independently acquired.
LOC110257671	36042052	36140080	N.A.	Independently acquired.
LOC110257750	37168973	37172889	N.A.	Independently acquired.
LOC110257673 (PRB2-like)	41579893	41581086	N.A.	Independently acquired.
LOC106506967 (SMC1AL)	46568746	46570505	N.A.	Lineage-specific duplcation - SMC1A at chrX:46143738.
LOC106506966	47552766	47561116	N.A.	Independently acquired.
LOC100511853 (GMCL1-like)	49726706	49729782	N.A.	Independently acquired.
LOC100621166 (CXORF49L)	57678534	57682641	N.A.	Lineage-specific duplication.
LOC100525624 (NAP1L2L)	58941164	58951122	N.A.	Lineage-specific duplication.
LOC110257684 (DPH3 homolog)	71948753	71949100	N.A.	Independently acquired.
LOC110257687 (NXF3L)	84109452	84117997	N.A.	Lineage-specific duplication.
LOC106508237	84409372	84468158	N.A.	Independently acquired.
LOC110257688 (CFAP251-like)	85039485	85040165	N.A.	Independently acquired.
LOC100515519 (NCL-like)	86974106	86976917	N.A.	Independently acquired.
LOC100738042 (MIC10-like)	92197909	92199862	N.A.	Independently acquired.
LOC110257690	95554791	95654903	N.A.	Independently acquired.
LOC414400 (RPLP1L)	96800950	96875862	N.A.	Independently acquired.
LOC100511059 (OR1020L)	107752365	107762735	N.A.	Lineage-specific duplication.
LOC110257712 (FAM127L)	110813912	110815239	N.A.	Lineage-specific duplication.
LOC100157667 (INTS6L)	111094016	111110838	N.A.	Independently acquired.
LOC100621767 (ADGRG4L)	111469540	111488383	N.A.	Lineage-specific duplication.
LOC102158723	112845408	112848002	N.A.	Independently acquired.
LOC110257694 (PRB2-like)	113340076	113341321	N.A.	Independently acquired.
LOC110257749 (SEC31L)	114575980	115026005	N.A.	Independently acquired.
LOC110257823	115725317	115728246	N.A.	Independently acquired.
LOC102157658 (MAGEA13P)	118448490	118566819	N.A.	Lineage-specific duplication.
LOC110257797	121231431	121500019	N.A.	Independently acquired.
LOC110257715 (MAGEA10L)	121632759	121634665	Ampliconic	Lineage-specific duplication.
LOC100156285 (MAGEA10L)	121688350	121691552	N.A.	Lineage-specific duplication.
LOC100514940 (MAGEA10L)	121699620	121702252	N.A.	Lineage-specific duplication.
LOC100513838 (MAGEA10L)	121708847	121709729	N.A.	Lineage-specific duplication.
LOC100513259 (MAGE8L)	121755015	121756449	N.A.	Lineage-specific duplication.
LOC106504240 (MAGE10L)	121763484	121765954	N.A.	Lineage-specific duplication.
LOC106506163	121776859	121800481	N.A.	Independently acquired.
LOC110257698 (MAGE8L)	123869573	123870559	N.A.	Lineage-specific duplication.
LOC100154655 (SYCP3L)	124078500	124089002	N.A.	Lineage-specific duplication.
LOC110257703 (PNMA6FL)	124203040	124204023	N.A.	Lineage-specific duplication.
LOC110257704 (COL3A1)	124870296	124881007	N.A.	Independently acquired.
LOC100737597 (IF-2-like)	125072091	125097974	N.A.	Independently acquired.
LOC102158155 (CXorf49L)	125109070	125112343	N.A.	Lineage-specific duplication.
LOC110257705 (OR10VL)	125122994	125125168	N.A.	Independently acquired.
LOC102166335 (LAGE3-like)	125150593	125152014	N.A.	Lineage-specific duplication.
LOC106507061 (EVA1C-like)	125579523	125595031	N.A.	Independently acquired.

## Sheet: SupplementalTableS10
Supplemental Table S10. Ampliconic regions of the human X chromosome with strict coordinates and combining ampliconic regions within 500kb on one another.
Strict Coordinates					500kb Inclusive Coordinates
Chr	Start	End	Length		Chr	Start	End	Length
X	3821643	3938401	116758		X	3821643	3938401	116758
X	48366973	48396313	29340		X	48366973	48428451	61478
X	48401508	48428451	26943		X	49528395	49605060	76665
X	49528395	49605060	76665		X	51668020	52920401	1252381
X	51668020	51692962	24942		X	55453508	55480140	26632
X	52040715	52077119	36404		X	58716337	58846090	129753
X	52473395	52502273	28878		X	59467608	59975932	508324
X	52669254	52729002	59748		X	61974100	61984719	10619
X	52756104	52789250	33146		X	63129000	63224416	95416
X	52881815	52920401	38586		X	71683102	71798461	115359
X	55453508	55480140	26632		X	72740931	72979901	238970
X	58716337	58735885	19548		X	102197558	102489558	292000
X	58763534	58804502	40968		X	103953836	103989433	35597
X	58805114	58846090	40976		X	106266280	106278816	12536
X	59467608	59477725	10117		X	115843208	115886139	42931
X	59822836	59838106	15270		X	120038203	120198162	159959
X	59934949	59975932	40983		X	120929382	120987033	57651
X	61974100	61984719	10619		X	135116125	135889734	773609
X	63129000	63185599	56599		X	141002115	141585255	583140
X	63207431	63224416	16985		X	146801758	146822756	20998
X	71683102	71740753	57651		X	149573132	149796256	223124
X	71740843	71798461	57618		X	152678581	153293926	615345
X	72740931	72860189	119258		X	154149491	155504549	1355058
X	72860608	72979901	119293				Total Length	6804303
X	102197558	102338169	140611
X	102402578	102489558	86980
X	103953836	103989433	35597
X	106266280	106278816	12536
X	115843208	115886139	42931
X	120038203	120087100	48897
X	120162296	120198162	35866
X	120929382	120987033	57651
X	135116125	135157508	41383
X	135216626	135256412	39786
X	135748585	135759399	10814
X	135759524	135889734	130210
X	141002115	141114704	112589
X	141493097	141585255	92158
X	146801758	146822756	20998
X	149573132	149602259	29127
X	149652865	149681126	28261
X	149768806	149796256	27450
X	152678581	152728807	50226
X	152773139	152789894	16755
X	153106017	153149747	43730
X	153252384	153293926	41542
X	154149491	154239883	90392
X	154240302	154294509	54207
X	154555883	154591326	35443
X	155336693	155370939	34246
X	155469353	155504549	35196
		Total Length	2499509

[truncated: 4 more sheets: SupplementalTableS11, SupplementalTableS12, SupplementalTableS13, SupplementalTableS14]
